# Supplementary material for: Targeted protein degradation systems to enhance Wnt signaling
Source: eLife. 2024 Jun 7;13:RP93908. doi: 10.7554/eLife.93908 (PMC11161174; doi:10.7554/eLife.93908)
Supplement: Figure 1—source data 1. [file elife-93908-fig1-data1.xlsx]

## Sheet: Figure 1A
Binding of hASGR1 to 8M24-IgG1
Sensor Location	Sample ID	Loading Sample ID	KD (M)	kon(1/Ms)	kdis(1/s)	RMax	KD Error	kon Error	kdis Error	RMax Error	Conc. (nM)	Response	kobs(1/s)	Req	Req/Rmax(%)	Full X^2	Full R^2	SSG KD	SSG Rmax	SSG R^2	Selected	Include	Index	Color	Sensor Type	Sensor Info	Replicate Group	Baseline Loc.	Assoc. (Sample) Loc.	Dissoc. Loc.	Loading Well Location	Cycle
B5	hASGR1 CBD	8M24 IgG	<1.0E-12	739300	<1.0E-07	0.2118	1.401e-11	1837		0.0002	333.3	0.2125	0.2464	0.2118	100	0.0189	0.9982	<1.0E-12	0.2118	0.8333	x	x	24	-1264826	SA (Streptavidin)		N/A	B1	B4	B1	B3	1
C5	hASGR1 CBD	8M24 IgG	<1.0E-12	739300	<1.0E-07	0.2118	1.401e-11	1837		0.0002	111.1	0.2112	0.08214	0.2118	100	0.0189	0.9982	<1.0E-12	0.2118	0.8333	x	x	25	-1264826	SA (Streptavidin)		N/A	C1	C4	C1	C3	1
D5	hASGR1 CBD	8M24 IgG	<1.0E-12	739300	<1.0E-07	0.2118	1.401e-11	1837		0.0002	37	0.2003	0.02738	0.2118	100	0.0189	0.9982	<1.0E-12	0.2118	0.8333	x	x	26	-1264826	SA (Streptavidin)		N/A	D1	D4	D1	D3	1
E5	hASGR1 CBD	8M24 IgG	<1.0E-12	739300	<1.0E-07	0.2118	1.401e-11	1837		0.0002	12.4	0.138	0.00913	0.2118	100	0.0189	0.9982	<1.0E-12	0.2118	0.8333	x	x	27	-1264826	SA (Streptavidin)		N/A	E1	E4	E1	E3	1
F5	hASGR1 CBD	8M24 IgG	<1.0E-12	739300	<1.0E-07	0.2118	1.401e-11	1837		0.0002	4.12	0.0558	0.003042	0.2118	100	0.0189	0.9982	<1.0E-12	0.2118	0.8333	x	x	28	-1264826	SA (Streptavidin)		N/A	F1	F4	F1	F3	1
G5	hASGR1 CBD	8M24 IgG	<1.0E-12	739300	<1.0E-07	0.2118	1.401e-11	1837		0.0002	1.37	0.0161	0.001014	0.2118	100	0.0189	0.9982	<1.0E-12	0.2118	0.8333	x	x	29	-1264826	SA (Streptavidin)		N/A	G1	G4	G1	G3	1

## Sheet: Figure 1B
Non-binding of mASGR1, hASGR2, and mASGR2 to 8M24-IgG1
Sensor Location	Sample ID	Loading Sample ID	KD (M)	kon(1/Ms)	kdis(1/s)	RMax	KD Error	kon Error	kdis Error	RMax Error	Conc. (nM)	Response	kobs(1/s)	Req	Req/Rmax(%)	Full X^2	Full R^2	SSG KD	SSG Rmax	SSG R^2	Selected	Include	Index	Color	Sensor Type	Sensor Info	Replicate Group	Baseline Loc.	Assoc. (Sample) Loc.	Dissoc. Loc.	Loading Well Location	Cycle
B6	mASGR1 CBD	8M24 IgG	<1.0E-12	15300	<1.0E-07	0.0087	5.899e-08	10120		0.0047	333.3	-0.0002	0.0051	0.0087	100	0.013	0.194	<1.0E-12	0.0087	1		x	30	-14513767	SA (Streptavidin)		N/A	B1	B5	B1	B3	1
B7	hASGR2 CBD	8M24 IgG	<1.0E-12	111700	<1.0E-07	0.0047	5.703e-09	14990		0.0003	333.3	0.0014	0.03723	0.0047	100	0.0163	0.3349					x	36	-4545552	SA (Streptavidin)		N/A	B1	B6	B1	B3	1
B8	mASGR2 CBD	8M24 IgG	<1.0E-12	90130	<1.0E-07	0.0069	4.453e-09	7772		0.0003	333.3	0.0052	0.03004	0.0069	100	0.0121	0.5161	<1.0E-12	0.0069	0.8333		x	42	-363184	SA (Streptavidin)		N/A	B1	B7	B1	B3	1

## Sheet: Figure 1C
Binding of hASGR1 to 8G8-IgG1
Sensor Location	Sample ID	Loading Sample ID	KD (M)	kon(1/Ms)	kdis(1/s)	RMax	KD Error	kon Error	kdis Error	RMax Error	Conc. (nM)	Response	kobs(1/s)	Req	Req/Rmax(%)	Full X^2	Full R^2	SSG KD	SSG Rmax	SSG R^2	Selected	Include	Index	Color	Sensor Type	Sensor Info	Replicate Group	Baseline Loc.	Assoc. (Sample) Loc.	Dissoc. Loc.	Loading Well Location	Cycle
B1	hASGR1 CBD	8G8 IgG	1.686e-09	548400	0.0009246	0.2022	3.248e-11	2198	1.742e-05	0.0003	333.3	0.2062	0.1837	0.2012	99.5	0.0373	0.9959	1.7e-09	0.2022	1		x	0	-14261055	SA (Streptavidin)		N/A	B1	B4	B1	B2	1
C1	hASGR1 CBD	8G8 IgG	1.686e-09	548400	0.0009246	0.2022	3.248e-11	2198	1.742e-05	0.0003	111.1	0.1921	0.06185	0.1992	98.5	0.0373	0.9959	1.7e-09	0.2022	1		x	1	-14261055	SA (Streptavidin)		N/A	C1	C4	C1	C2	1
D1	hASGR1 CBD	8G8 IgG	1.686e-09	548400	0.0009246	0.2022	3.248e-11	2198	1.742e-05	0.0003	37	0.1762	0.02124	0.1934	95.6	0.0373	0.9959	1.7e-09	0.2022	1		x	2	-14261055	SA (Streptavidin)		N/A	D1	D4	D1	D2	1
E1	hASGR1 CBD	8G8 IgG	1.686e-09	548400	0.0009246	0.2022	3.248e-11	2198	1.742e-05	0.0003	12.4	0.1097	0.007697	0.1779	88	0.0373	0.9959	1.7e-09	0.2022	1		x	3	-14261055	SA (Streptavidin)		N/A	E1	E4	E1	E2	1
F1	hASGR1 CBD	8G8 IgG	1.686e-09	548400	0.0009246	0.2022	3.248e-11	2198	1.742e-05	0.0003	4.12	0.0479	0.003181	0.1434	70.9	0.0373	0.9959	1.7e-09	0.2022	1		x	4	-14261055	SA (Streptavidin)		N/A	F1	F4	F1	F2	1
G1	hASGR1 CBD	8G8 IgG	1.686e-09	548400	0.0009246	0.2022	3.248e-11	2198	1.742e-05	0.0003	1.37	0.0114	0.001677	0.0907	44.9	0.0373	0.9959	1.7e-09	0.2022	1		x	5	-14261055	SA (Streptavidin)		N/A	G1	G4	G1	G2	1

## Sheet: Figure 1D
Binding of hASGR2 to 8G8-IgG1
Sensor Location	Sample ID	Loading Sample ID	KD (M)	kon(1/Ms)	kdis(1/s)	RMax	KD Error	kon Error	kdis Error	RMax Error	Conc. (nM)	Response	kobs(1/s)	Req	Req/Rmax(%)	Full X^2	Full R^2	SSG KD	SSG Rmax	SSG R^2	Selected	Include	Index	Color	Sensor Type	Sensor Info	Replicate Group	Baseline Loc.	Assoc. (Sample) Loc.	Dissoc. Loc.	Loading Well Location	Cycle
B3	hASGR2 CBD	8G8 IgG	3.312e-07	258500	0.08561	0.2092	1.066e-08	7091	0.001441	0.0033	333.3	0.1068	0.1717	0.1049	50.2	0.0276	0.9795	3.3e-07	0.2092	1		x	12	-3721216	SA (Streptavidin)		N/A	B1	B6	B1	B2	1
C3	hASGR2 CBD	8G8 IgG	3.312e-07	258500	0.08561	0.2092	1.066e-08	7091	0.001441	0.0033	111.1	0.0507	0.1143	0.0525	25.1	0.0276	0.9795	3.3e-07	0.2092	1		x	13	-3721216	SA (Streptavidin)		N/A	C1	C6	C1	C2	1
D3	hASGR2 CBD	8G8 IgG	3.312e-07	258500	0.08561	0.2092	1.066e-08	7091	0.001441	0.0033	37	0.0197	0.09518	0.021	10.1	0.0276	0.9795	3.3e-07	0.2092	1		x	14	-3721216	SA (Streptavidin)		N/A	D1	D6	D1	D2	1
E3	hASGR2 CBD	8G8 IgG	3.312e-07	258500	0.08561	0.2092	1.066e-08	7091	0.001441	0.0033	12.4	0.0071	0.0888	0.0075	3.6	0.0276	0.9795	3.3e-07	0.2092	1		x	15	-3721216	SA (Streptavidin)		N/A	E1	E6	E1	E2	1
F3	hASGR2 CBD	8G8 IgG	3.312e-07	258500	0.08561	0.2092	1.066e-08	7091	0.001441	0.0033	4.12	0.0009	0.08667	0.0026	1.2	0.0276	0.9795	3.3e-07	0.2092	1		x	16	-3721216	SA (Streptavidin)		N/A	F1	F6	F1	F2	1
G3	hASGR2 CBD	8G8 IgG	3.312e-07	258500	0.08561	0.2092	1.066e-08	7091	0.001441	0.0033	1.37	0.002	0.08596	0.0009	0.4	0.0276	0.9795	3.3e-07	0.2092	1		x	17	-3721216	SA (Streptavidin)		N/A	G1	G6	G1	G2	1

## Sheet: Figure 1E
Binding of mASGR1 to 8G8-IgG1
Sensor Location	Sample ID	Loading Sample ID	KD (M)	kon(1/Ms)	kdis(1/s)	RMax	KD Error	kon Error	kdis Error	RMax Error	Conc. (nM)	Response	kobs(1/s)	Req	Req/Rmax(%)	Full X^2	Full R^2	SSG KD	SSG Rmax	SSG R^2	Selected	Include	Index	Color	Sensor Type	Sensor Info	Replicate Group	Baseline Loc.	Assoc. (Sample) Loc.	Dissoc. Loc.	Loading Well Location	Cycle
B2	mASGR1 CBD	8G8 IgG	3.396e-07	534200	0.1814	0.1412	1.691e-08	21370	0.005373	0.0027	333.3	0.0704	0.3595	0.0699	49.5	0.0186	0.97	3.4e-07	0.1412	1		x	6	-12144190	SA (Streptavidin)		N/A	B1	B5	B1	B2	1
C2	mASGR1 CBD	8G8 IgG	3.396e-07	534200	0.1814	0.1412	1.691e-08	21370	0.005373	0.0027	111.1	0.032	0.2408	0.0348	24.6	0.0186	0.97	3.4e-07	0.1412	1		x	7	-12144190	SA (Streptavidin)		N/A	C1	C5	C1	C2	1
D2	mASGR1 CBD	8G8 IgG	3.396e-07	534200	0.1814	0.1412	1.691e-08	21370	0.005373	0.0027	37	0.013	0.2012	0.0139	9.8	0.0186	0.97	3.4e-07	0.1412	1		x	8	-12144190	SA (Streptavidin)		N/A	D1	D5	D1	D2	1
E2	mASGR1 CBD	8G8 IgG	3.396e-07	534200	0.1814	0.1412	1.691e-08	21370	0.005373	0.0027	12.4	0.0076	0.188	0.005	3.5	0.0186	0.97	3.4e-07	0.1412	1		x	9	-12144190	SA (Streptavidin)		N/A	E1	E5	E1	E2	1
F2	mASGR1 CBD	8G8 IgG	3.396e-07	534200	0.1814	0.1412	1.691e-08	21370	0.005373	0.0027	4.12	0.0022	0.1836	0.0017	1.2	0.0186	0.97	3.4e-07	0.1412	1		x	10	-12144190	SA (Streptavidin)		N/A	F1	F5	F1	F2	1
G2	mASGR1 CBD	8G8 IgG	3.396e-07	534200	0.1814	0.1412	1.691e-08	21370	0.005373	0.0027	1.37	-0.0027	0.1822	0.0006	0.4	0.0186	0.97	3.4e-07	0.1412	1		x	11	-12144190	SA (Streptavidin)		N/A	G1	G5	G1	G2	1

## Sheet: Figure 1F
Binding of mASGR2 to 8G8-IgG1
Sensor Location	Sample ID	Loading Sample ID	KD (M)	kon(1/Ms)	kdis(1/s)	RMax	KD Error	kon Error	kdis Error	RMax Error	Conc. (nM)	Response	kobs(1/s)	Req	Req/Rmax(%)	Full X^2	Full R^2	SSG KD	SSG Rmax	SSG R^2	Selected	Include	Index	Color	Sensor Type	Sensor Info	Replicate Group	Baseline Loc.	Assoc. (Sample) Loc.	Dissoc. Loc.	Loading Well Location	Cycle
B4	mASGR2 CBD	8G8 IgG	5.013e-05	6905	0.3461	6.3225	0.0002329	32080	0.02197	29.2817	333.3	0.041	0.3484	0.0418	0.7	0.0174	0.9233	5e-05	6.3225	1		x	18	-8992723	SA (Streptavidin)		N/A	B1	B7	B1	B2	1
C4	mASGR2 CBD	8G8 IgG	5.013e-05	6905	0.3461	6.3225	0.0002329	32080	0.02197	29.2817	111.1	0.0115	0.3469	0.014	0.2	0.0174	0.9233	5e-05	6.3225	1		x	19	-8992723	SA (Streptavidin)		N/A	C1	C7	C1	C2	1
D4	mASGR2 CBD	8G8 IgG	5.013e-05	6905	0.3461	6.3225	0.0002329	32080	0.02197	29.2817	37	0.004	0.3464	0.0047	0.1	0.0174	0.9233	5e-05	6.3225	1		x	20	-8992723	SA (Streptavidin)		N/A	D1	D7	D1	D2	1
E4	mASGR2 CBD	8G8 IgG	5.013e-05	6905	0.3461	6.3225	0.0002329	32080	0.02197	29.2817	12.4	-0.0025	0.3462	0.0016	0	0.0174	0.9233	5e-05	6.3225	1		x	21	-8992723	SA (Streptavidin)		N/A	E1	E7	E1	E2	1
F4	mASGR2 CBD	8G8 IgG	5.013e-05	6905	0.3461	6.3225	0.0002329	32080	0.02197	29.2817	4.12	-0.004	0.3462	0.0005	0	0.0174	0.9233	5e-05	6.3225	1		x	22	-8992723	SA (Streptavidin)		N/A	F1	F7	F1	F2	1
G4	mASGR2 CBD	8G8 IgG	5.013e-05	6905	0.3461	6.3225	0.0002329	32080	0.02197	29.2817	1.37	-0.0076	0.3461	0.0002	0	0.0174	0.9233	5e-05	6.3225	1		x	23	-8992723	SA (Streptavidin)		N/A	G1	G7	G1	G2	1
