# Supplementary material for: Targeted protein degradation systems to enhance Wnt signaling
Source: eLife. 2024 Jun 7;13:RP93908. doi: 10.7554/eLife.93908 (PMC11161174; doi:10.7554/eLife.93908)
Supplement: Figure 5—source data 1. [file elife-93908-fig5-data1.xlsx]

## Sheet: Figure 5B
Figure 5B STF raw reading
log [Protein] nM	4F3-RSPO2RA			8M24-RSPO2RA			8G8-RSPO2RA			αGFP-RSPO2RA
2	2753920	2629960	2552240	2334880	2524040	2514360	2186160	2148680	2188960	1743200	1833840	1749800
1	2442120	2565240	2428880	2565800	2515520	2366120	2317280	2328040	2377320	1408040	1381040	1212280
0	2463840	2480440	2537440	2343720	2400200	2421080	2237720	2470880	2318120	1036040	976280	926160
-1	2374640	2365000	2397400	2104320	2278640	2382960	1700600	1849600	1750720	412440	417480	447200
-2	1851480	2009360	1884080	1264720	1402800	1351880	445920	485240	466400	205360	266320	212120
-3	637840	640880	671880	317320	354000	334440	212200	213320	215320	230960	173160	186960
-4	188080	199440	182800	176520	185640	179600	156600	164080	162800	169120	167120	173240

## Sheet: Figure 5C
Figure 5C STF raw reading
log [Protein] nM	4F3-RSPO2RA			8M24-RSPO2RA			8G8-RSPO2RA			αGFP-RSPO2RA
1	1360000	1230000	1260000	1370000	1250000	1270000	785120	802880	920320	861440	1110000	1110000
0	1100000	1050000	1120000	959760	1040000	930160	540080	531440	615600	754400	1020000	951560
-1	245800	253160	243000	192240	210760	220840	160760	143360	151480	186200	196320	203920
-2	134520	124400	133240	105120	104480	103600	87440	104440	102000	105680	114040	129400
-3	103480	87520	88840	74680	89800	92440	85960	86680	72760	81400	97440	116960
-4	91120	80240	87520	70640	82480	91880	76800	79240	87680	76600	92400	103520
-5	87240	67960	84840	70160	88800	78720	76480	69640	80720	64520	78720	84480

## Sheet: Figure 5D
Figure 5D STF raw reading
log [Protein] nM	4F3-RSPO2RA			8M24-RSPO2RA			8G8-RSPO2RA			αGFP-RSPO2RA
1	1580000	1490000	1460000	1550000	1720000	1570000	1480000	1490000	1420000	666440	743120	892600
0	2380000	2130000	2310000	2240000	2000000	2130000	2100000	2070000	2010000	716080	795960	797400
-1	2020000	1820000	1930000	1720000	1630000	1570000	1450000	1450000	1390000	105280	101160	157680
-2	1030000	931800	917480	514800	547600	547400	482040	494200	400360	48040	54160	79040
-3	166080	151400	153600	107600	87600	114400	82240	83400	66600	45880	43080	73360
-4	66600	52600	61720	50680	48640	41480	52800	49560	49920	37120	32040	51680
-5	46360	52880	43600	48760	58040	48160	41720	53000	51760	32760	28760	59760
