# Supplementary material for: Targeted protein degradation systems to enhance Wnt signaling
Source: eLife. 2024 Jun 7;13:RP93908. doi: 10.7554/eLife.93908 (PMC11161174; doi:10.7554/eLife.93908)
Supplement: Figure 6—figure supplement 1—source data 5. [file elife-93908-fig6-figsupp1-data5.xlsx]

## Sheet: Figure 6-Figure Suppl. 1A 
Quantitation data of Figure 6-Figure Supplement 1A right panel
	4F3-RSPO2RA			8M24-RSPO2RA			8G8-RSPO2PA
0.1	0.96	0.81	0.7	0.92	0.93	0.98	0.91	0.96	0.8
1	0.35	0.38	0.49	0.65	0.54	0.68	0.86	0.54	0.68
5	0.22	0.15	0.16	0.22	0.23	0.2	0.7	0.35	0.58
10	0.2	0.17	0.16	0.19	0.24	0.14	0.57	0.28	0.49
50	0.19	0.2	0.24	0.17	0.16	0.16	0.41	0.37	0.36
100	0.18	0.18	0.21	0.16	0.2	0.2	0.38	0.35	0.34

## Sheet: Figure 6-Figure Suppl. 1B
Quantitation data of Figure 6-Figure Supplement 1B bottom panel
	4F3-RSPO2RA			8M24-RSPO2RA			8G8-RSPO2PA
2	0.825971	0.889222	0.809141	0.85	0.85	0.57	0.89	0.85	0.75
4	0.641367	0.743571	0.607318	0.46	0.53	0.35	0.66	0.68	0.64
8	0.426013	0.444216	0.373453	0.19	0.26	0.18	0.53	0.61	0.48
24	0.237571	0.362796	0.266509	0.16	0.21	0.17	0.53	0.51	0.39
48	0.242091	0.398469	0.317681	0.16	0.23	0.21	0.59	0.59	0.44

## Sheet: Figure 6-Figure Suppl. 1C
Quantitation data of Figure 6-Figure Supplement 1C right panels
αGFP-RSPO2RA	4F3-RSPO2RA	4F3-IgG
0.78	0.16	0.29
0.95	0.21	0.55
1.05	0.28	0.44
αGFP-RSPO2RA	8M24-RSPO2RA	8M24-IgG
1.28	0.17	0.62
1.27	0.37	0.94
0.92	0.11	0.24
αGFP-RSPO2RA	8G8-RSPO2RA	8G8-IgG
0.92	0.48	1.02
0.82	0.39	0.85
0.76	0.29	0.43
