# Supplementary material for: Targeted protein degradation systems to enhance Wnt signaling
Source: eLife. 2024 Jun 7;13:RP93908. doi: 10.7554/eLife.93908 (PMC11161174; doi:10.7554/eLife.93908)
Supplement: Figure 6—source data 5. [file elife-93908-fig6-data5.xlsx]

## Sheet: Figure 6A
Quantitation data of Figure 6A right panel
	4F3-RSPO2RA			8M24-RSPO2RA			8G8-RSPO2PA
0.1	0.62	0.7	0.73	0.87	0.82	0.95	1.02	1.26	0.94
1	0.5	0.25	0.39	0.62	0.32	0.4	0.88	0.93	0.72
5	0.24	0.22	0.25	0.27	0.31	0.32	0.81	0.75	0.63
10	0.28	0.21	0.19	0.17	0.32	0.25	0.64	0.55	0.43
50	0.3	0.22	0.18	0.19	0.36	0.18	0.28	0.27	0.2
100	0.19	0.25	0.16	0.13	0.23	0.22	0.22	0.21	0.19

## Sheet: Figure 6B
Quantitation data of Figure 6B bottom panel
	4F3-RSPO2RA			8M24-RSPO2RA			8G8-RSPO2PA
2	0.658035	0.961551	0.657866	0.73	0.74	0.63	0.94	0.74	0.78
4	0.68021	0.646388	0.393746	0.36	0.47	0.33	0.97	0.71	0.8
8	0.2451	0.364548	0.27664	0.19	0.2	0.18	0.76	0.5	0.81
24	0.369252	0.214803	0.307004	0.14	0.15	0.12	0.62	0.4	0.61
48	0.395476	0.254526	0.354771	0.18	0.14	0.14	0.63	0.52	0.77

## Sheet: Figure 6C
Quantitation data of Figure 6C right panels
αGFP-RSPO2RA	4F3-RSPO2RA	4F3-IgG
0.8	0.15	0.3
0.58	0.07	0.22
1.28	0.18	0.42
αGFP-RSPO2RA	8M24-RSPO2RA	8M24-IgG
1.01	0.13	0.82
1.29	0.22	0.63
0.92	0.23	1.04
αGFP-RSPO2RA	8G8-RSPO2RA	8G8-IgG
0.91	0.32	0.41
0.98	0.37	0.62
1.19	0.42	0.78
