# Supplementary material for: Targeted protein degradation systems to enhance Wnt signaling
Source: eLife. 2024 Jun 7;13:RP93908. doi: 10.7554/eLife.93908 (PMC11161174; doi:10.7554/eLife.93908)
Supplement: Figure 7—source data 4. [file elife-93908-fig7-data4.xlsx]

## Sheet: Figure 7D
Figure 7D STF raw reading
log [Protein] nM	4F3-RSPO2RA			8M24-RSPO2RA			8G8-RSPO2RA			αGFP-RSPO2RA
	113160	90080	113080	103080	115480	114280	138440	139520	117600	135080	121320	120320
1	2530000	2430000	2630000	2550000	2530000	2710000	2470000	2280000	2090000	912160	1180000	990640
0	3620000	3150000	3040000	2960000	3010000	2990000	2870000	2820000	2490000	828760	951040	863760
-1	2560000	2290000	2400000	2140000	2110000	2010000	1540000	1550000	1380000	137040	146640	140040
-2	1200000	1160000	1240000	605480	607320	574880	347400	315480	253800	52160	54960	75120
-3	223880	188040	201120	99040	93040	93120	70480	85800	46600	50920	50440	76560
-4	73120	64680	67760	52520	48240	51560	51680	51520	35240	35800	41880	52000
-5	55200	46240	44760	58080	42160	50920	56760	55520	41960	40560	54240	50520
