# Supplementary figures and images for: Targeted protein degradation systems to enhance Wnt signaling
Source: eLife journal article supplement (doi:10.7554/elife.93908), 2024-02-08

**8G8-RSPO2RA**

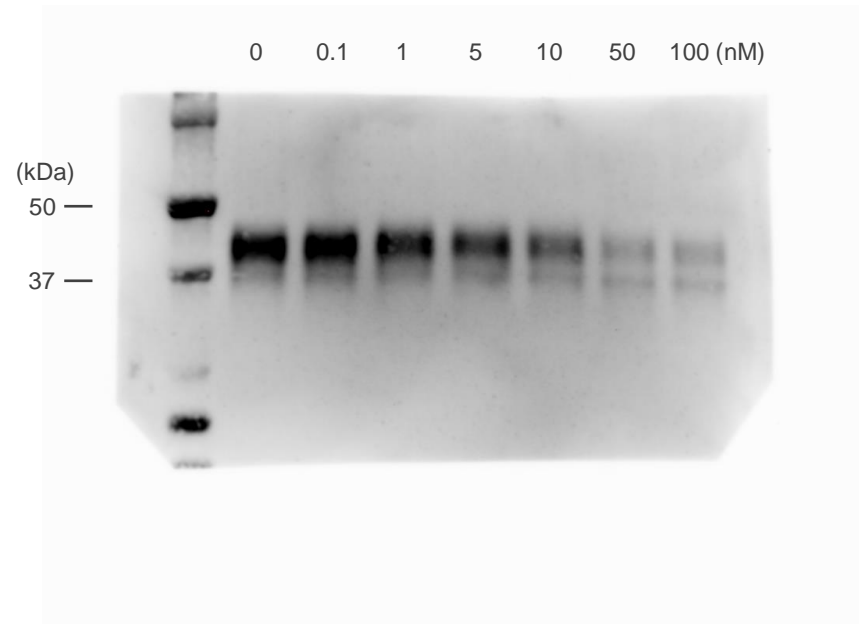

Supplement: fig6-data1 [file elife-93908-fig6-data1-v1.zip]

# 4F3-RSPO2RA

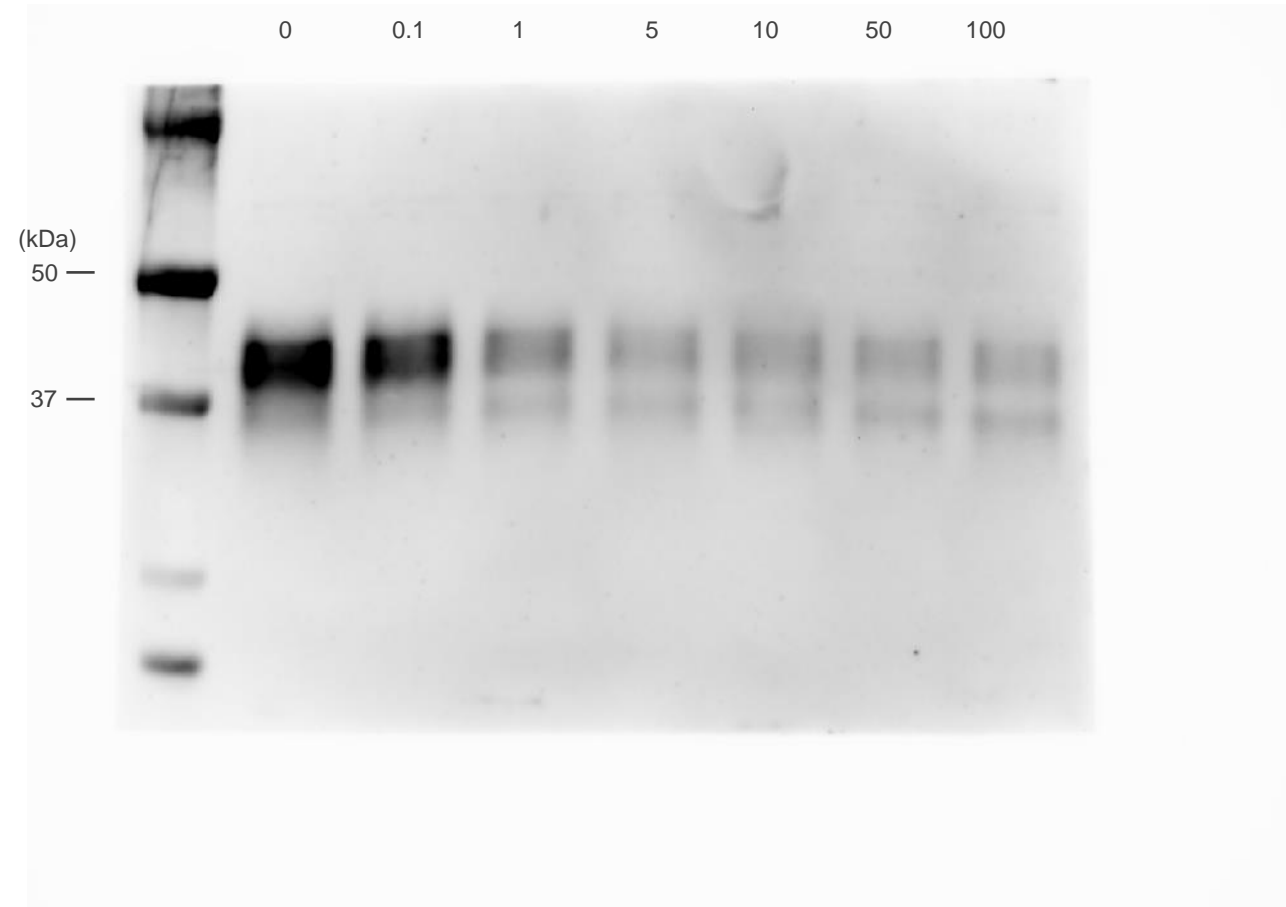

Supplement: fig6-data1 [file elife-93908-fig6-data1-v1.zip]

**4F3-RSPO2RA**

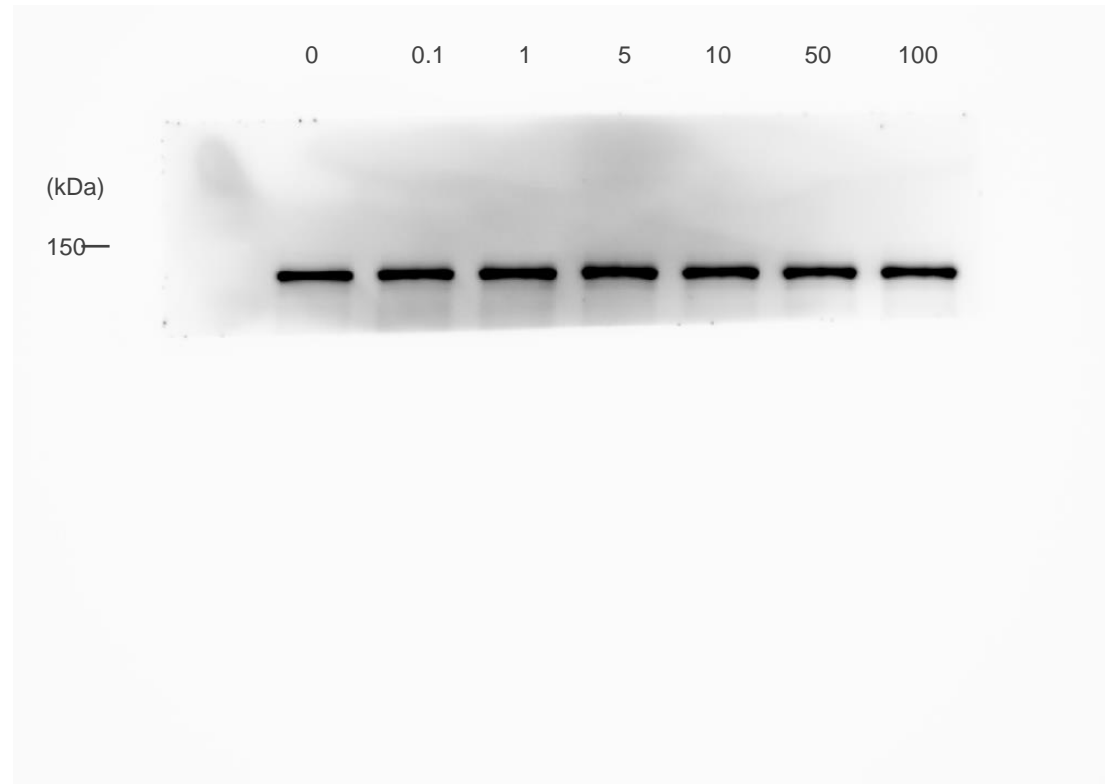

Supplement: fig6-data1 [file elife-93908-fig6-data1-v1.zip]

**8M24-RSPO2RA**

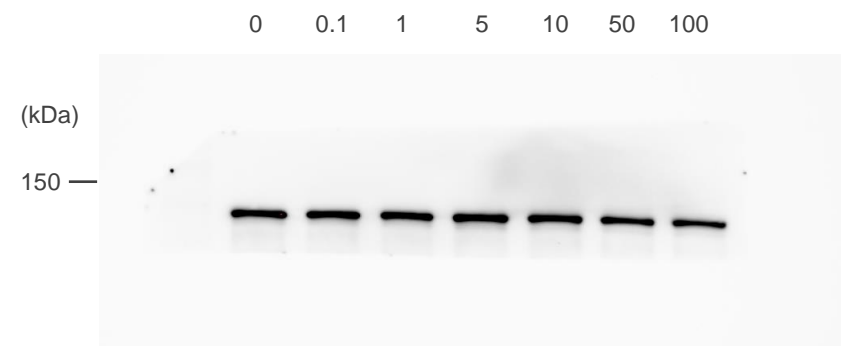

Supplement: fig6-data1 [file elife-93908-fig6-data1-v1.zip]

8M24-RSPO2RA

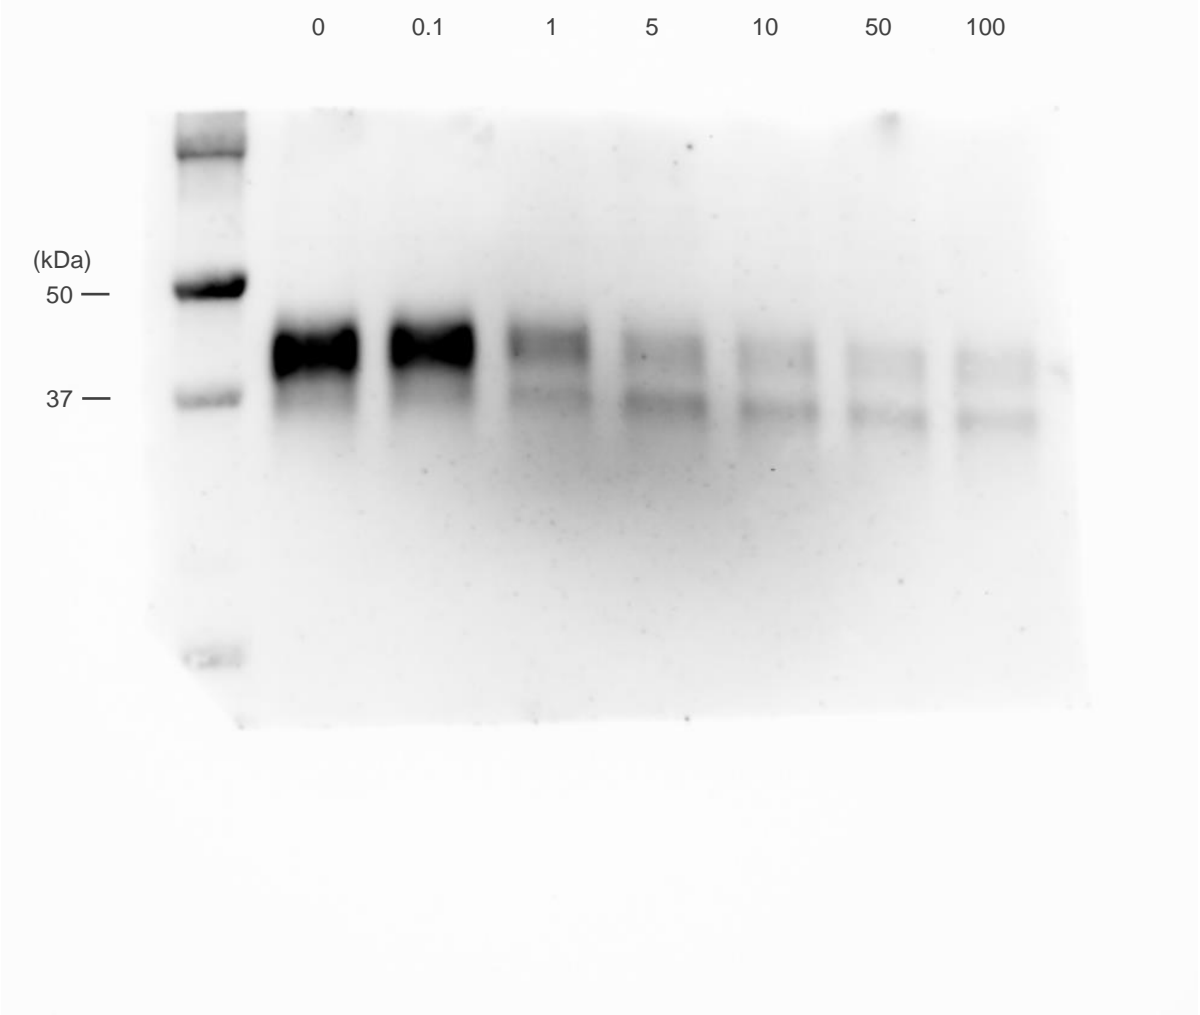

Supplement: fig6-data1 [file elife-93908-fig6-data1-v1.zip]

**8G8-RSPO2RA**

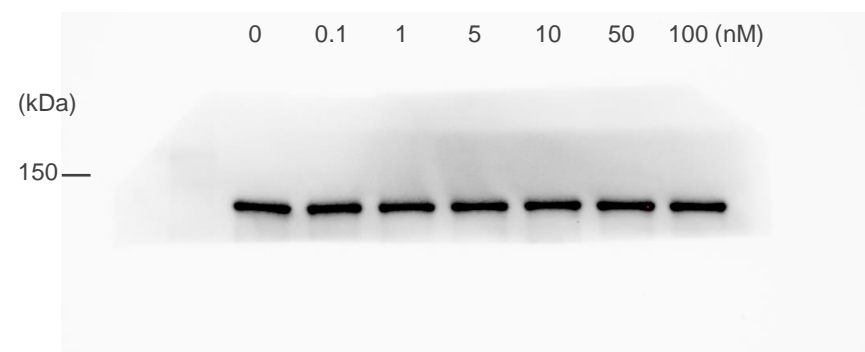

Supplement: fig6-data1 [file elife-93908-fig6-data1-v1.zip]

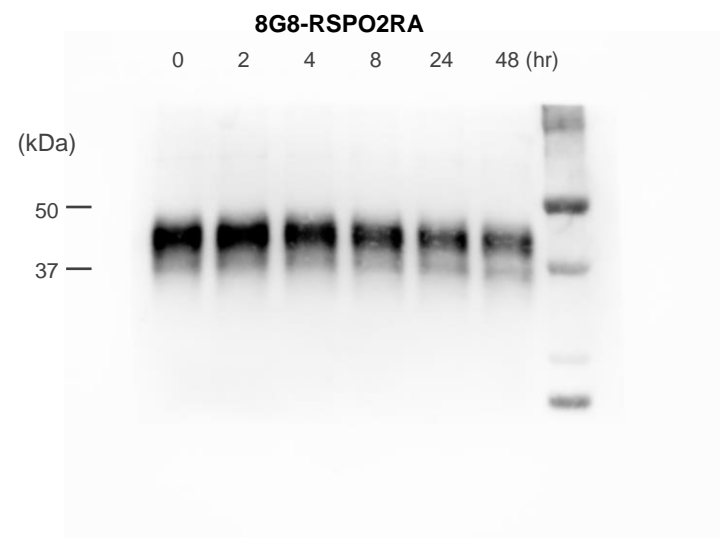

Supplement: fig6-data2 [file elife-93908-fig6-data2-v1.zip]

**4F3-RSPO2RA**

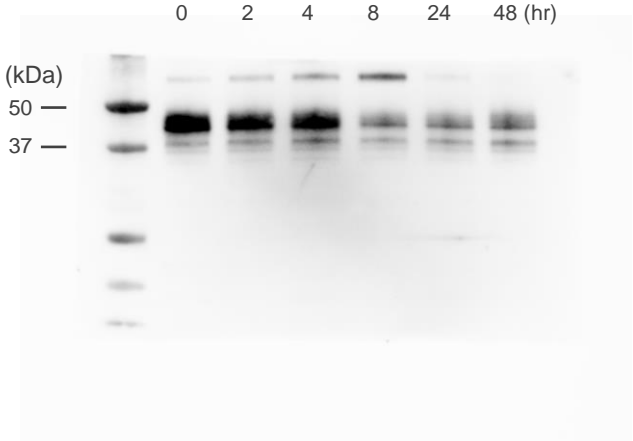

Supplement: fig6-data2 [file elife-93908-fig6-data2-v1.zip]

**8M24-RSPO2RA**

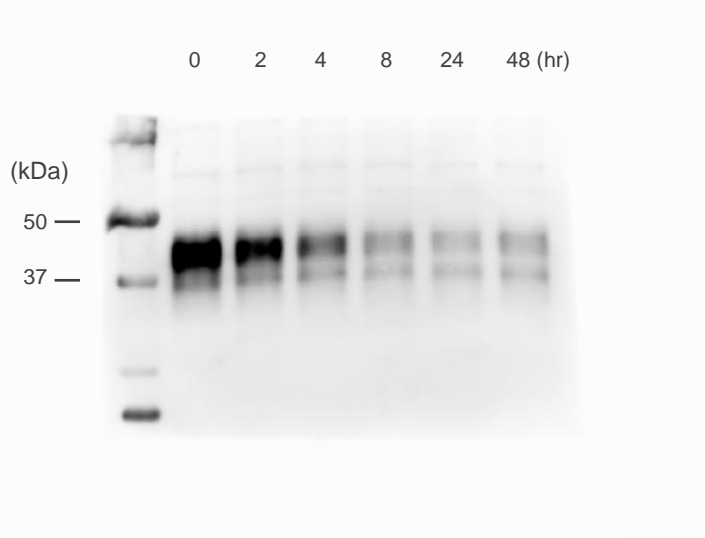

Supplement: fig6-data2 [file elife-93908-fig6-data2-v1.zip]

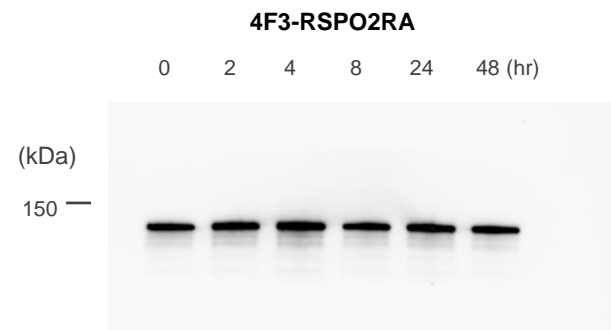

Supplement: fig6-data2 [file elife-93908-fig6-data2-v1.zip]

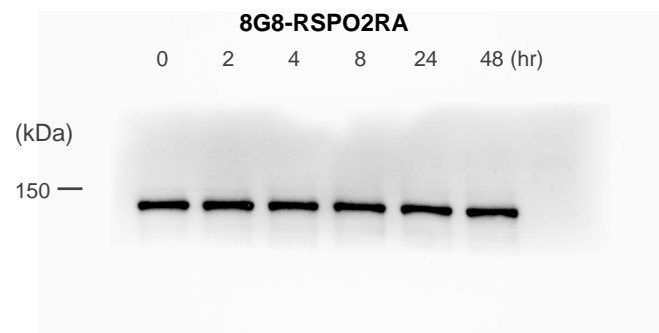

Supplement: fig6-data2 [file elife-93908-fig6-data2-v1.zip]

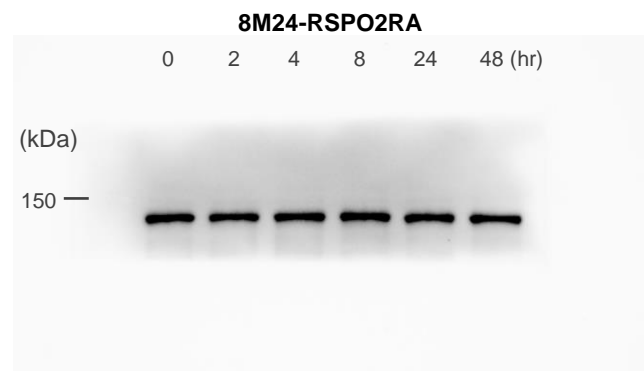

Supplement: fig6-data2 [file elife-93908-fig6-data2-v1.zip]

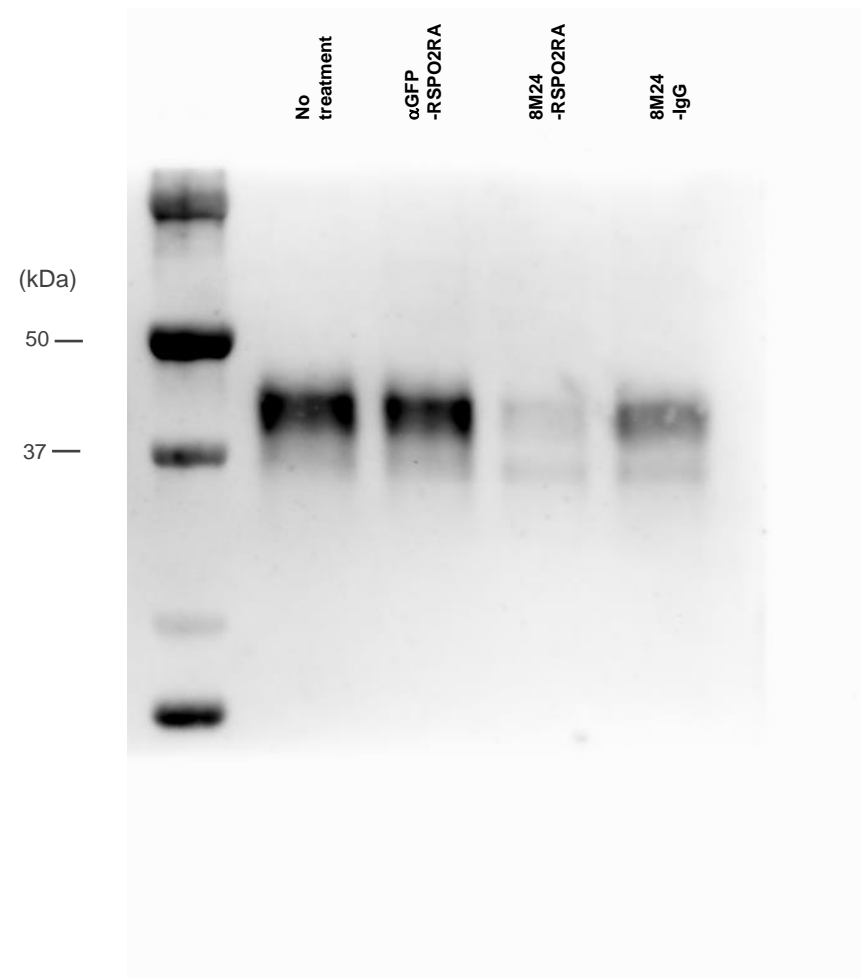

Supplement: fig6-data3 [file elife-93908-fig6-data3-v1.zip]

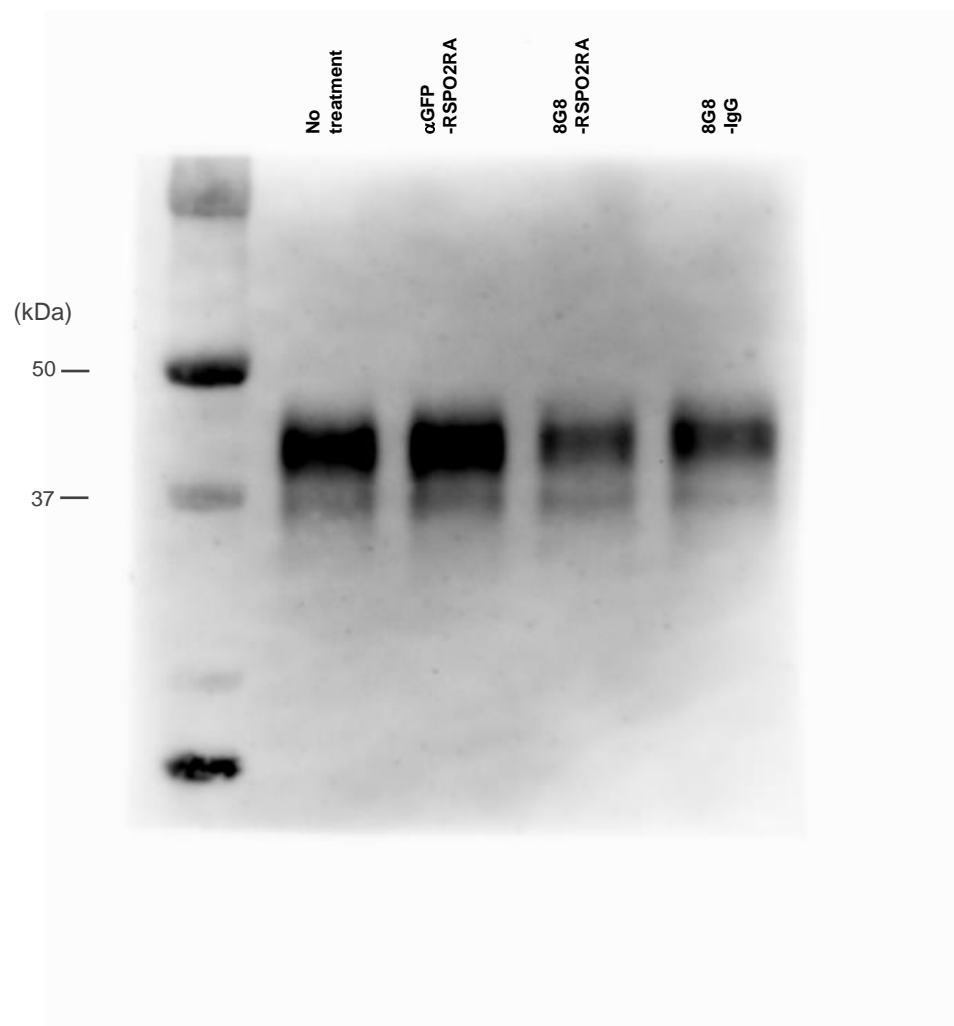

Supplement: fig6-data3 [file elife-93908-fig6-data3-v1.zip]

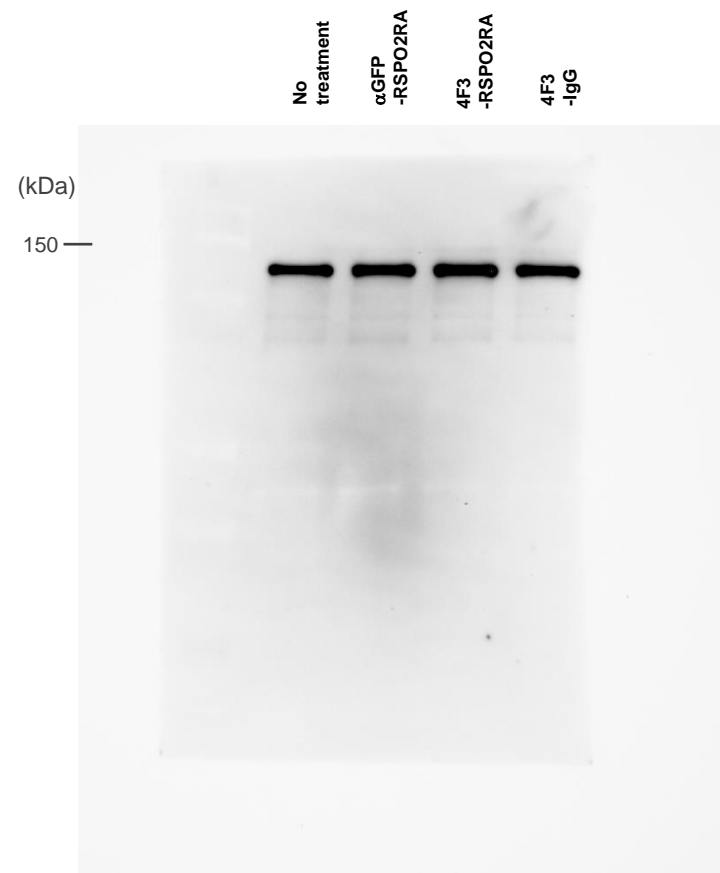

Supplement: fig6-data3 [file elife-93908-fig6-data3-v1.zip]

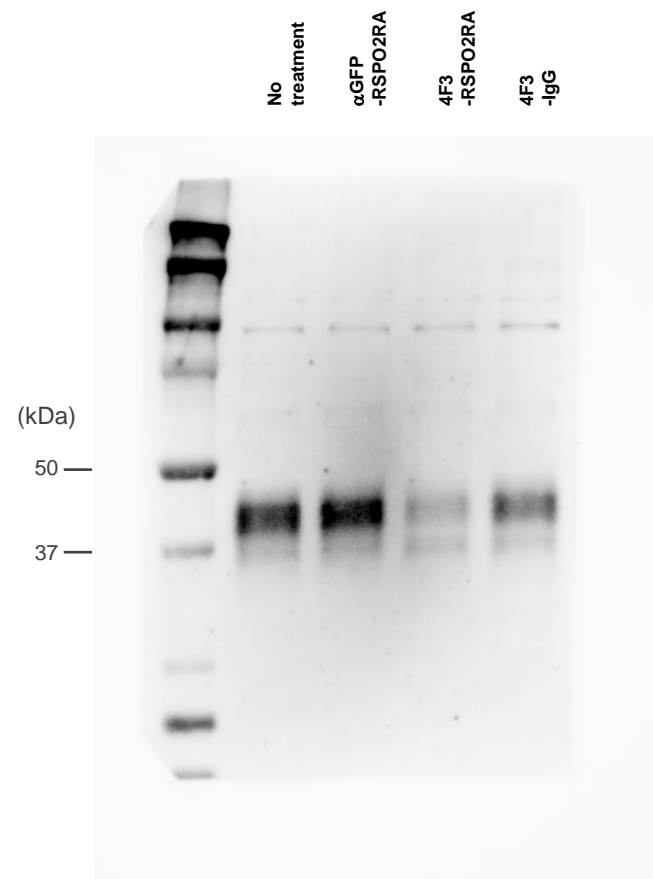

Supplement: fig6-data3 [file elife-93908-fig6-data3-v1.zip]

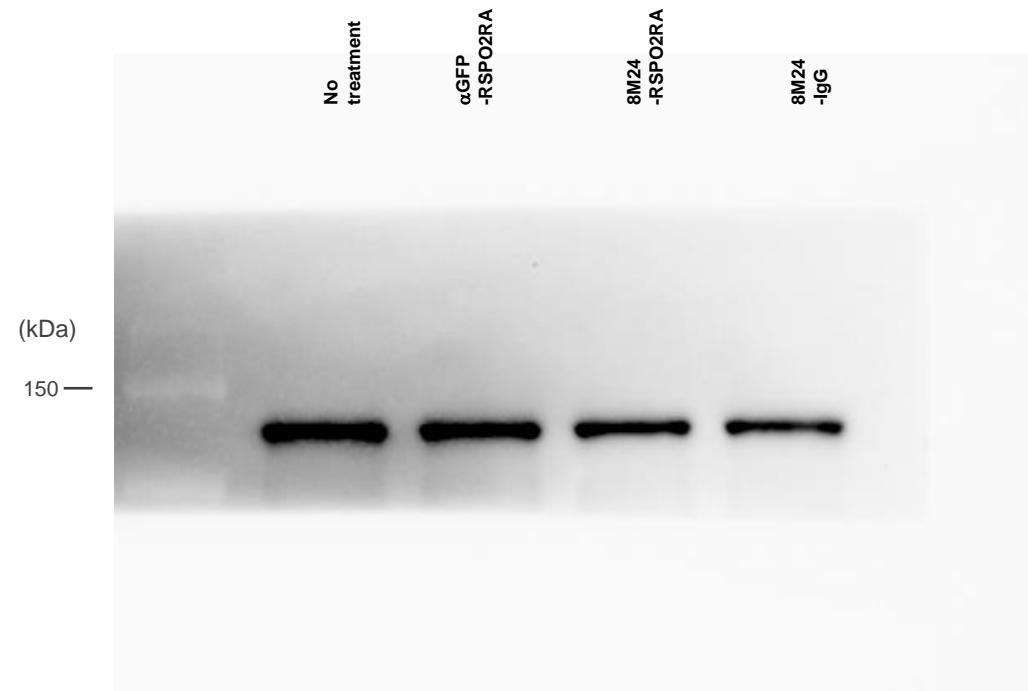

Supplement: fig6-data3 [file elife-93908-fig6-data3-v1.zip]

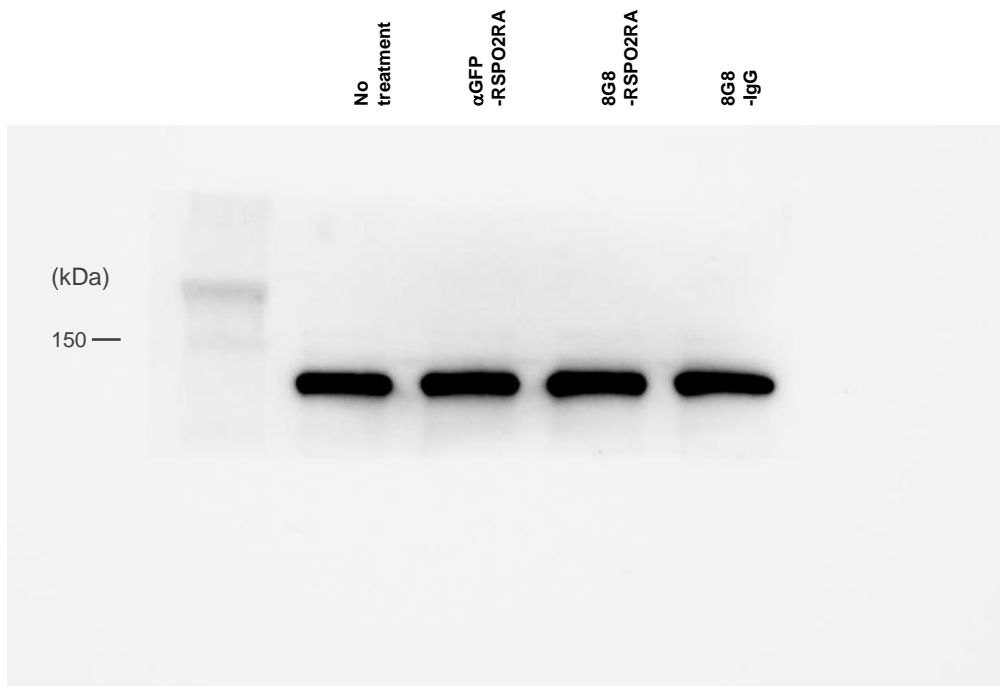

Supplement: fig6-data3 [file elife-93908-fig6-data3-v1.zip]

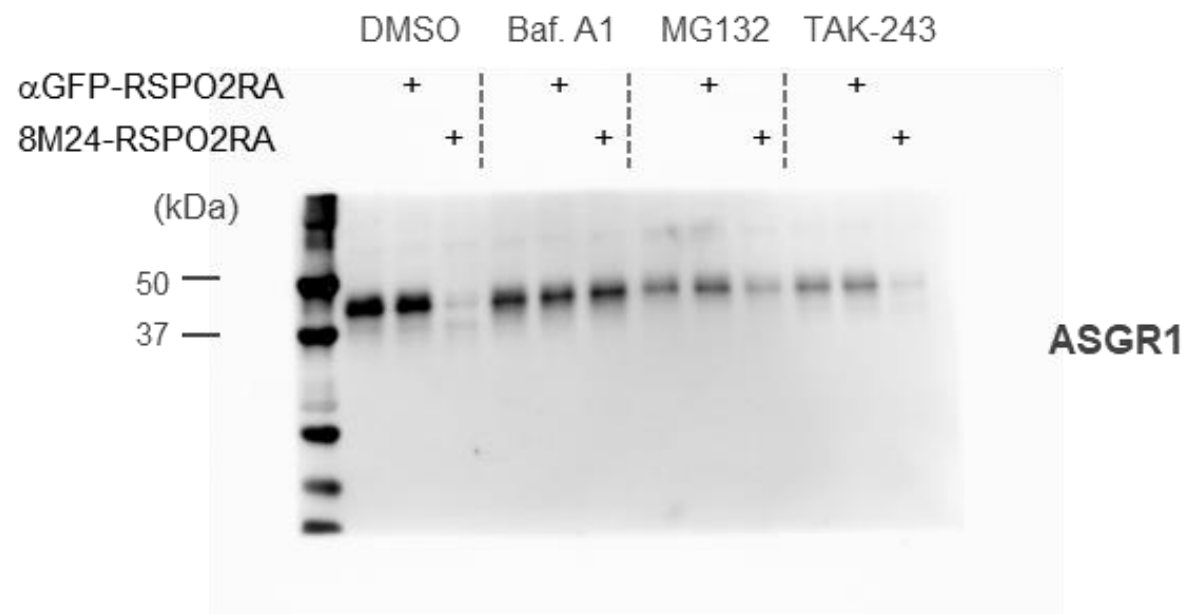

Supplement: fig6-data4 [file elife-93908-fig6-data4-v1.zip]

|                      | DMSO | Baf. A1 | MG132 | TAK-243 |
|----------------------|------|---------|-------|---------|
| $\alpha$ GFP-RSP02RA | +    | +       | +     | +       |
| 4F3-RSP02RA          | +    | +       | +     | +       |

(kDa)

20 —  
15 —  
10 —

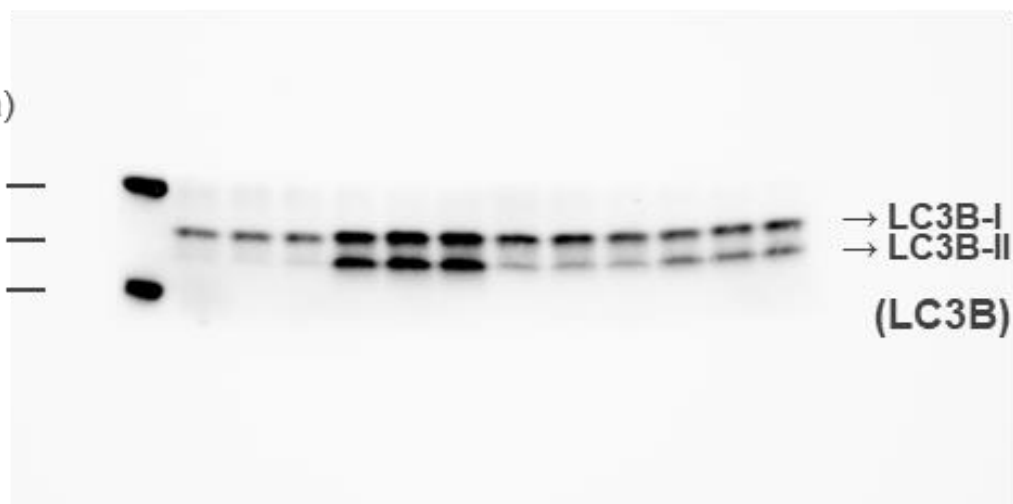

Supplement: fig6-data4 [file elife-93908-fig6-data4-v1.zip]

|                      | DMSO | Baf. A1 | MG132 | TAK-243 |
|----------------------|------|---------|-------|---------|
| $\alpha$ GFP-RSPO2RA | +    | +       | +     | +       |
| 8M24-RSPO2RA         | +    | +       | +     | +       |

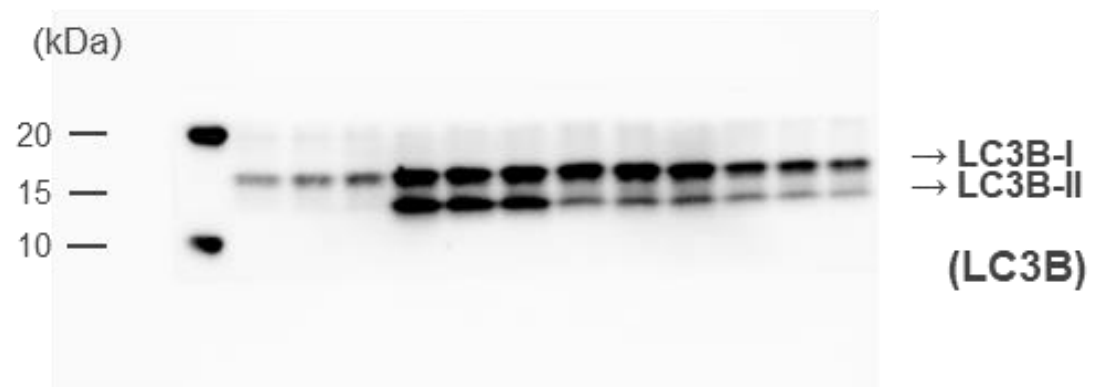

Supplement: fig6-data4 [file elife-93908-fig6-data4-v1.zip]

|                      | DMSO | Baf. A1 | MG132 | TAK-243 |
|----------------------|------|---------|-------|---------|
| $\alpha$ GFP-RSPO2RA | +    | +       | +     | +       |
| 8G8-RSPO2RA          | +    | +       | +     | +       |

(kDa)

20 —  
15 —  
10 —

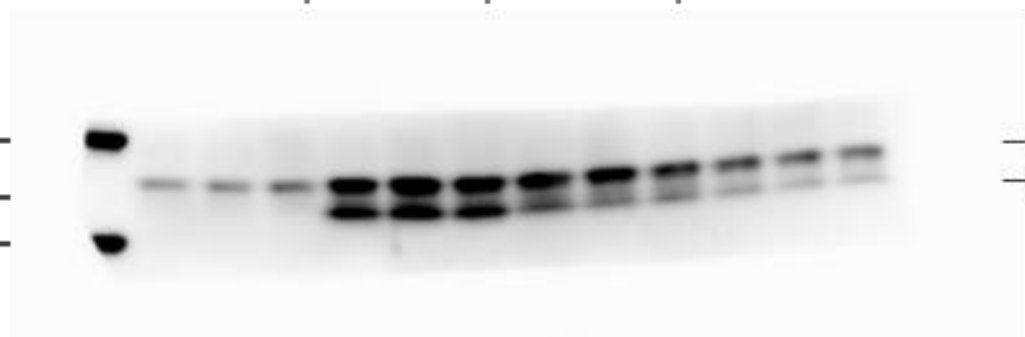

→ LC3B-I  
→ LC3B-II  
(LC3B)

Supplement: fig6-data4 [file elife-93908-fig6-data4-v1.zip]

|                      | DMSO | Baf. A1 | MG132 | TAK-243 |
|----------------------|------|---------|-------|---------|
| $\alpha$ GFP-RSP02RA | +    | +       | +     | +       |
| 8G8-RSP02RA          | +    | +       | +     | +       |

(kDa)

50 —

37 —

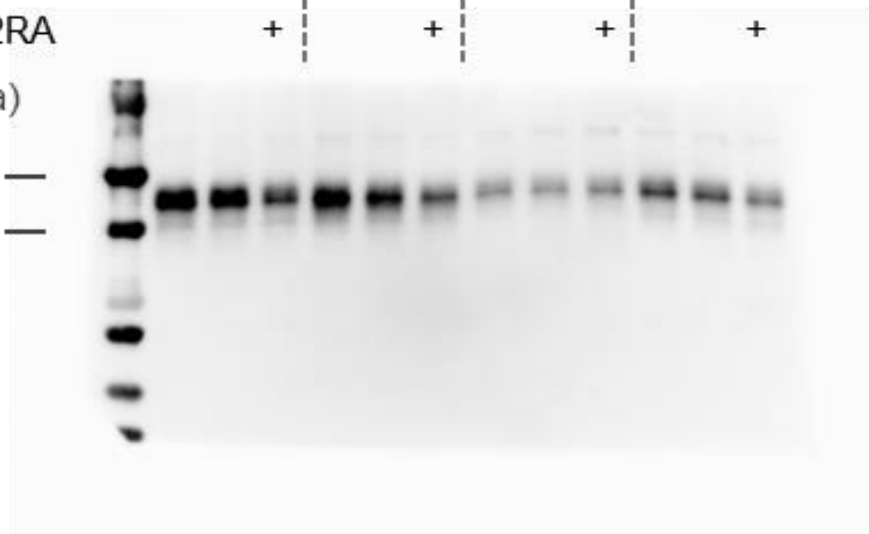

**ASGR1**

Supplement: fig6-data4 [file elife-93908-fig6-data4-v1.zip]

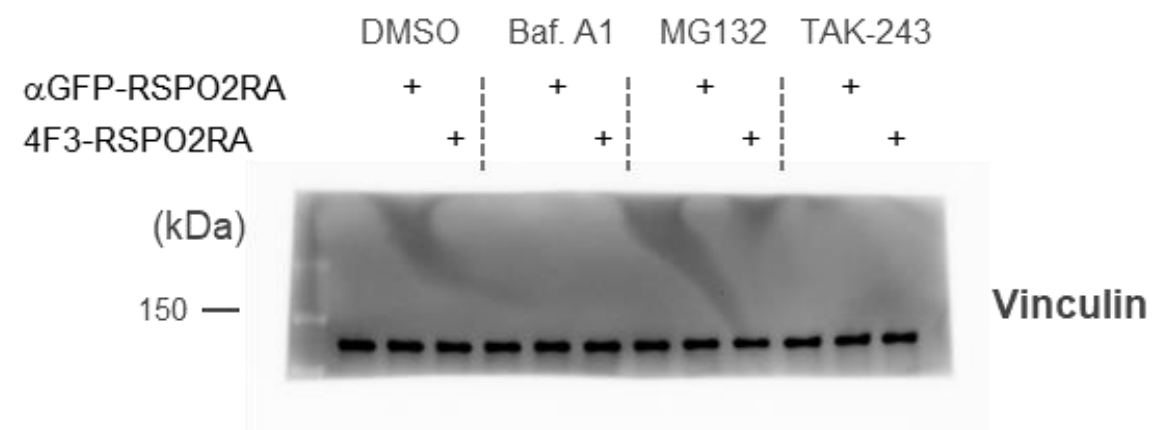

Supplement: fig6-data4 [file elife-93908-fig6-data4-v1.zip]

|                      | DMSO | Baf. A1 | MG132 | TAK-243 |
|----------------------|------|---------|-------|---------|
| $\alpha$ GFP-RSPO2RA | +    | +       | +     | +       |
| 8M24-RSPO2RA         | +    | +       | +     | +       |

(kDa)

250 —  
150 —  
100 —  
75 —  
50 —  
37 —

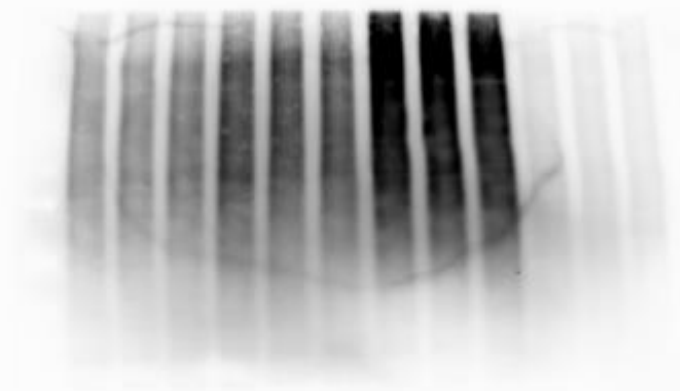

**Ubiquitin**

Supplement: fig6-data4 [file elife-93908-fig6-data4-v1.zip]

|                      | DMSO | Baf. A1 | MG132 | TAK-243 |
|----------------------|------|---------|-------|---------|
| $\alpha$ GFP-RSP02RA | +    | +       | +     | +       |
| 4F3-RSP02RA          | +    | +       | +     | +       |

(kDa)

250 —  
150 —  
100 —  
75 —  
50 —  
37 —

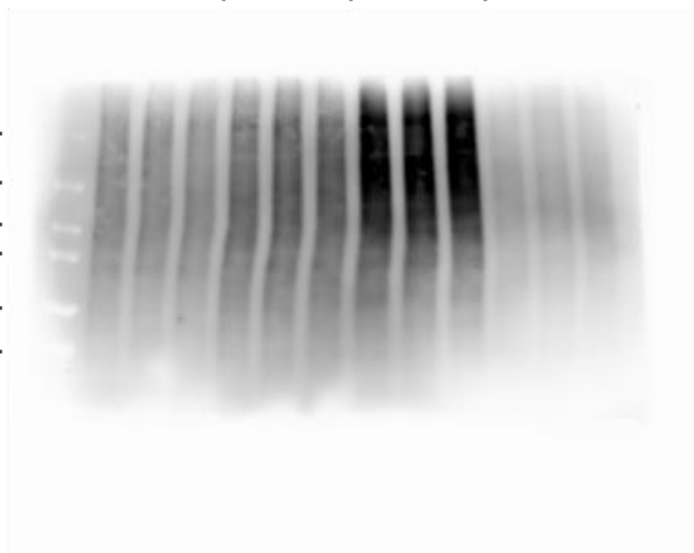

**Ubiquitin**

Supplement: fig6-data4 [file elife-93908-fig6-data4-v1.zip]

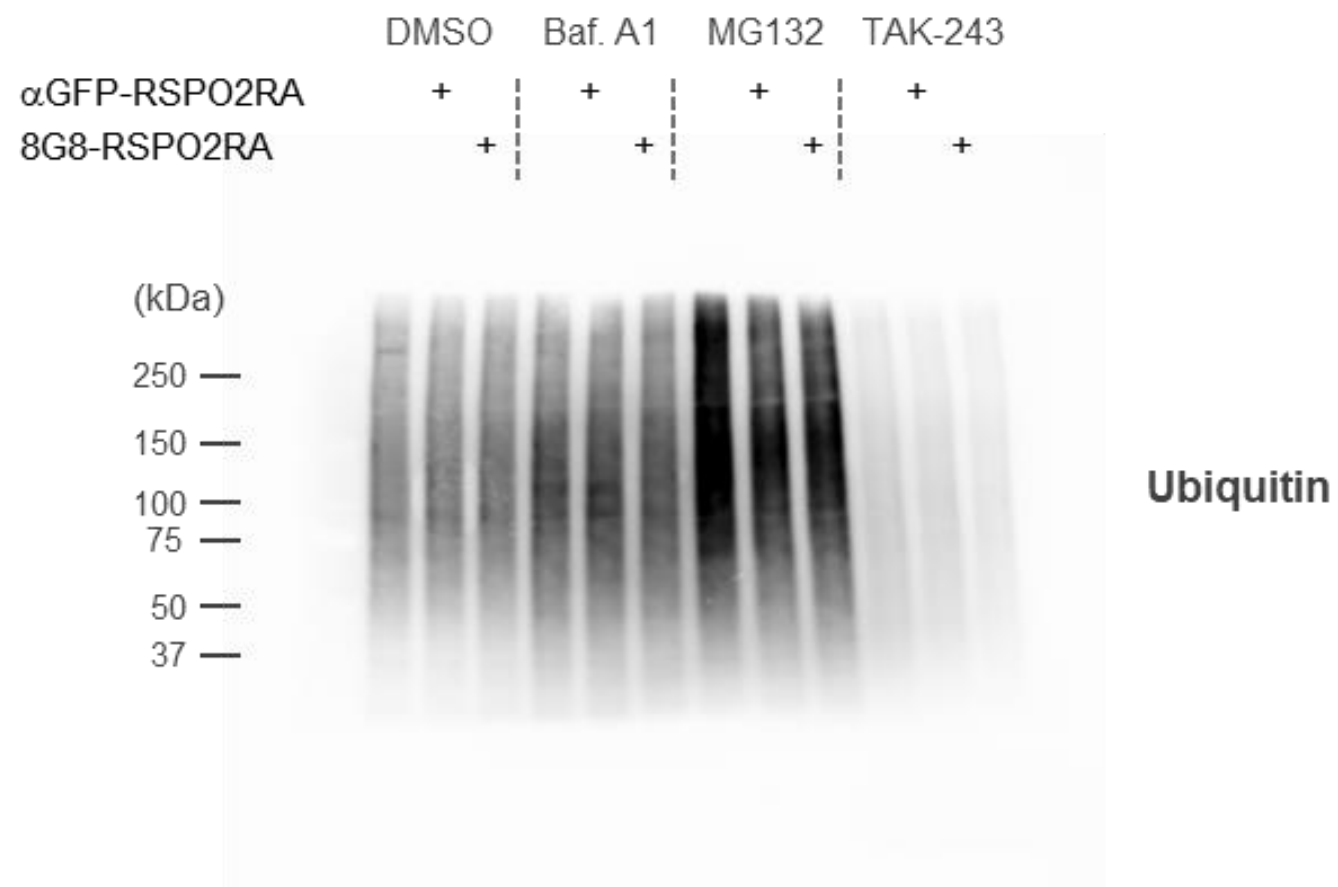

Supplement: fig6-data4 [file elife-93908-fig6-data4-v1.zip]

|                      | DMSO | Baf. A1 | MG132 | TAK-243 |
|----------------------|------|---------|-------|---------|
| $\alpha$ GFP-RSP02RA | +    | +       | +     | +       |
| 8M24-RSP02RA         | +    | +       | +     | +       |

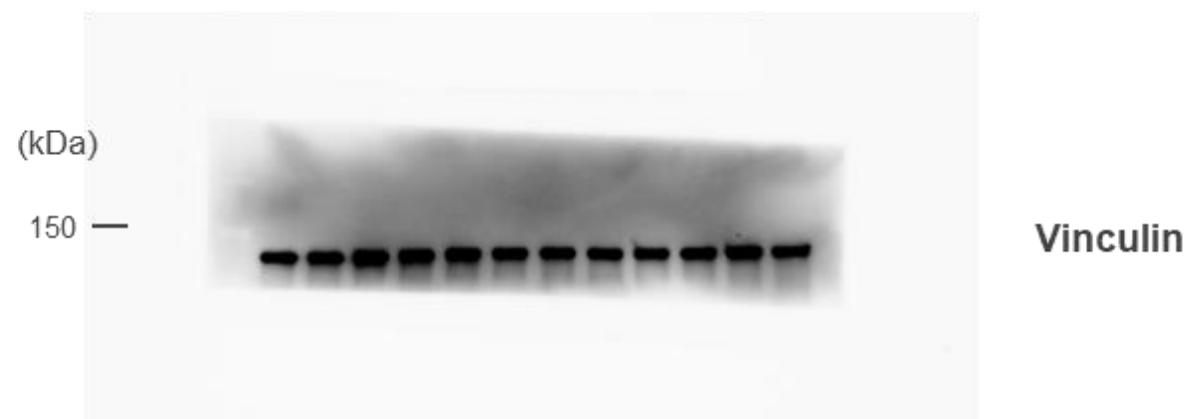

Supplement: fig6-data4 [file elife-93908-fig6-data4-v1.zip]

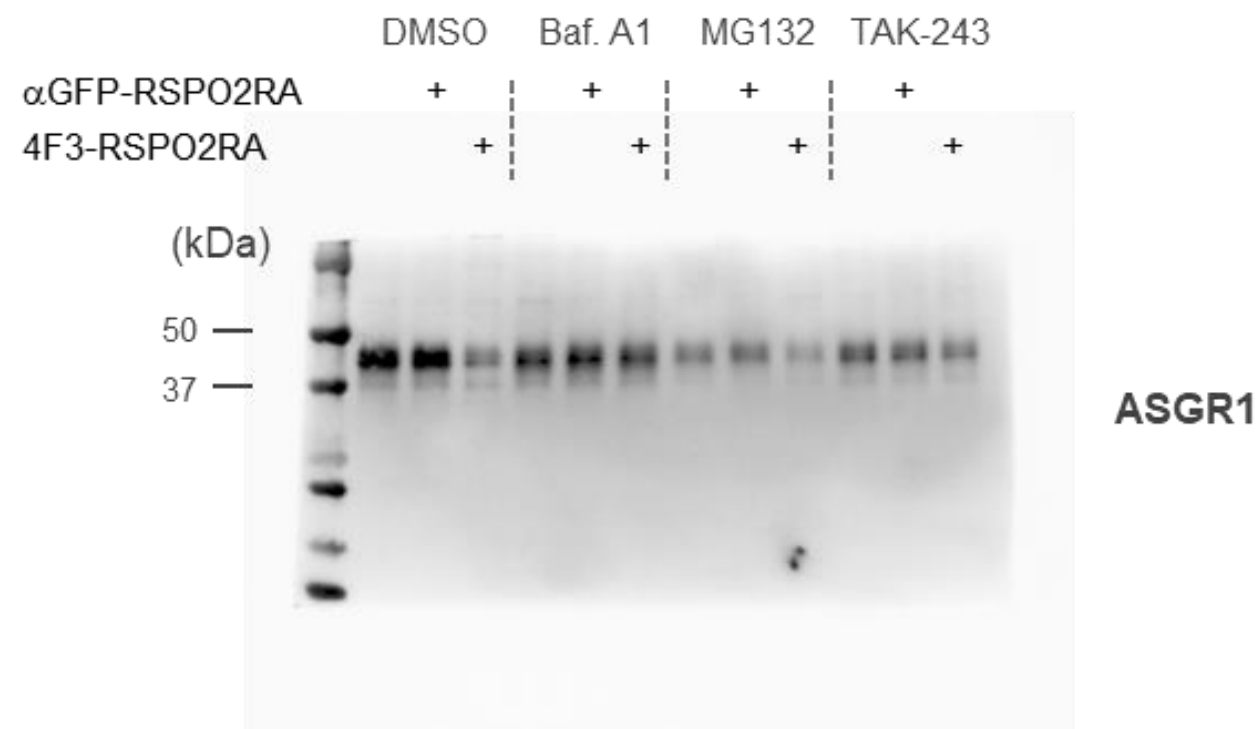

Supplement: fig6-data4 [file elife-93908-fig6-data4-v1.zip]

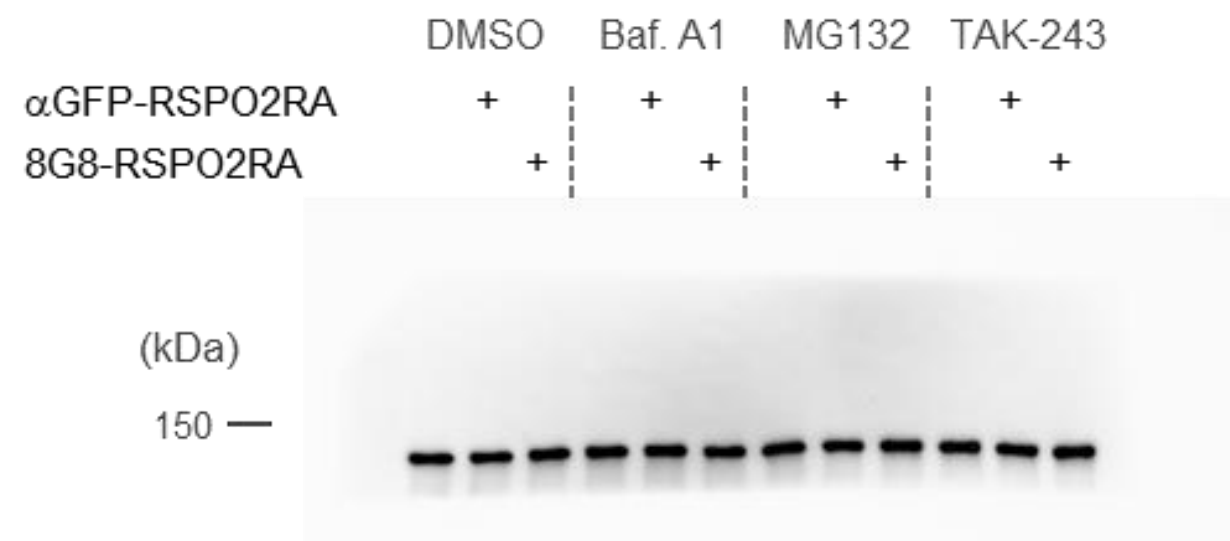

Supplement: fig6-data4 [file elife-93908-fig6-data4-v1.zip]

# 4F3-RSPO2RA

0 0.1 1 5 10 50 100 (nM)

(kDa)

150—

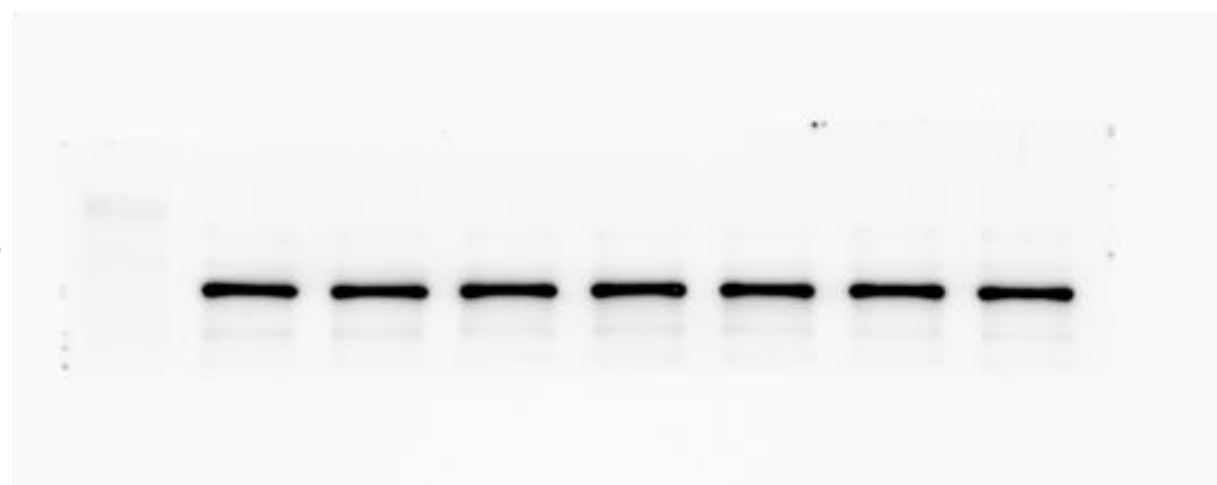

Supplement: fig6-figsupp1-data1 [file elife-93908-fig6-figsupp1-data1-v1.zip]

### 8M24-RSPO2RA

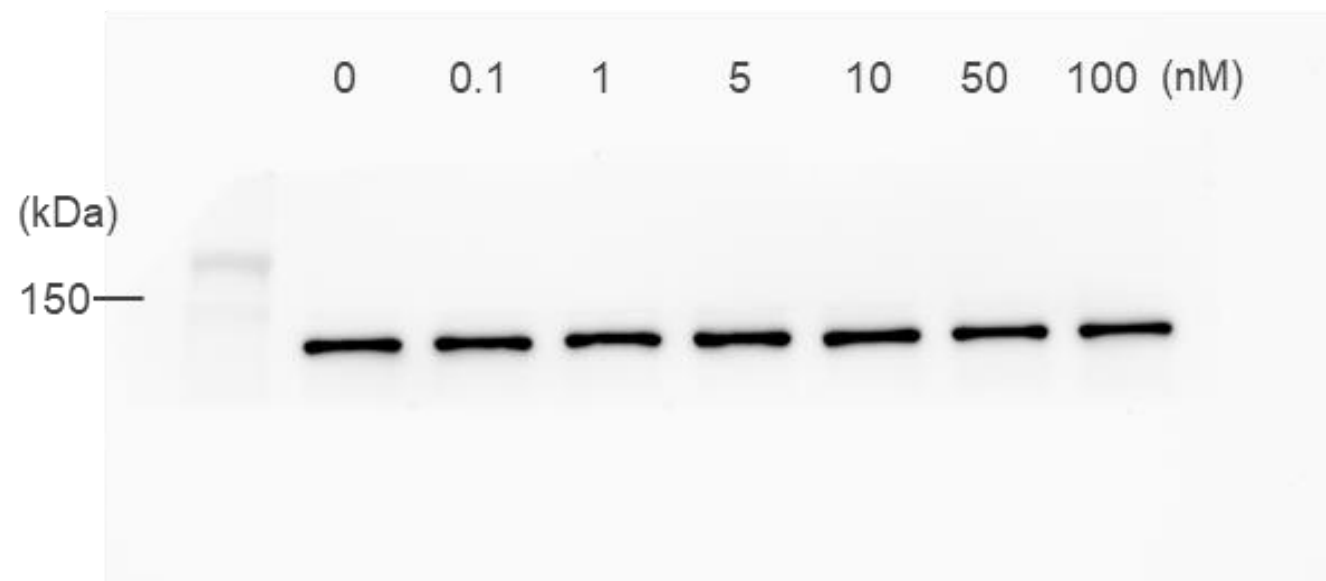

Supplement: fig6-figsupp1-data1 [file elife-93908-fig6-figsupp1-data1-v1.zip]

# 8M24-RSPO2RA

0 0.1 1 5 10 50 100 (nM)

(kDa)

50 —

37 —

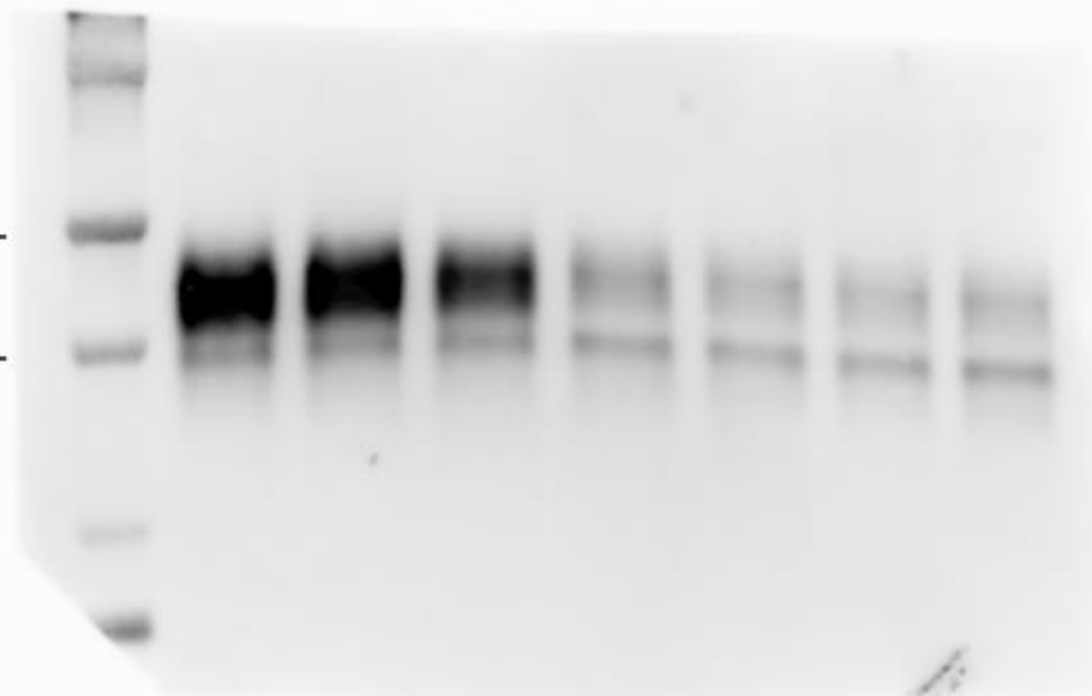

Supplement: fig6-figsupp1-data1 [file elife-93908-fig6-figsupp1-data1-v1.zip]

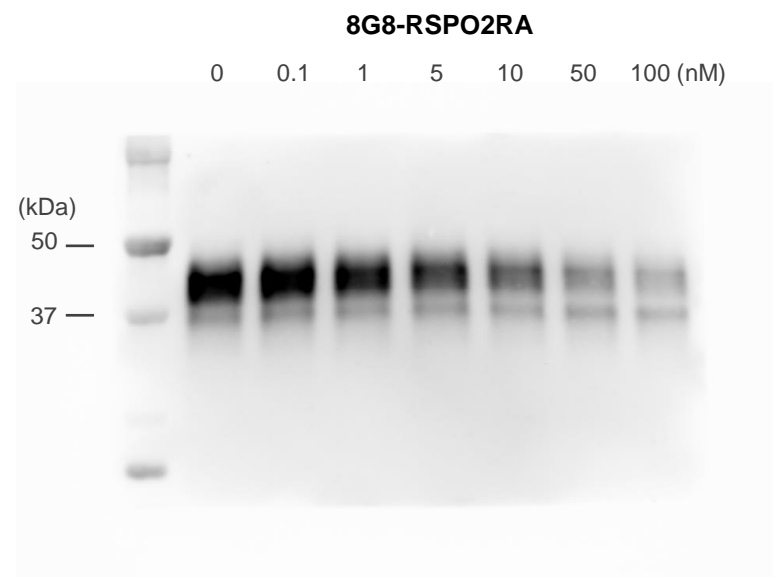

Supplement: fig6-figsupp1-data1 [file elife-93908-fig6-figsupp1-data1-v1.zip]

# 4F3-RSPO2RA

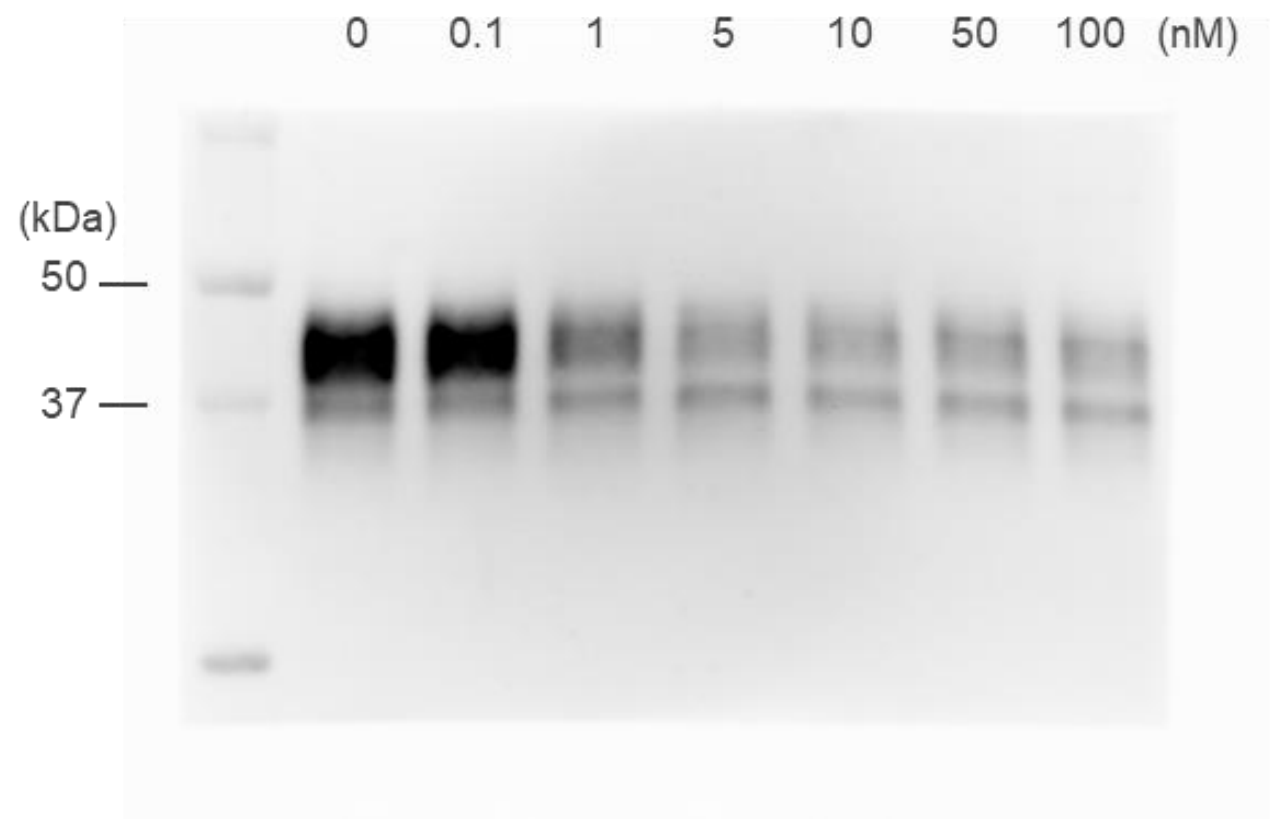

Supplement: fig6-figsupp1-data1 [file elife-93908-fig6-figsupp1-data1-v1.zip]

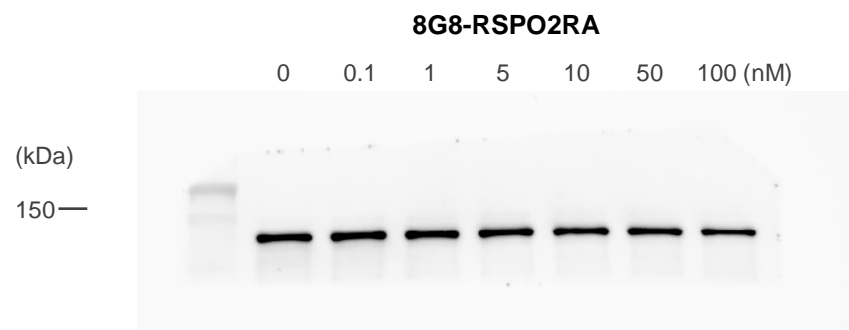

Supplement: fig6-figsupp1-data1 [file elife-93908-fig6-figsupp1-data1-v1.zip]

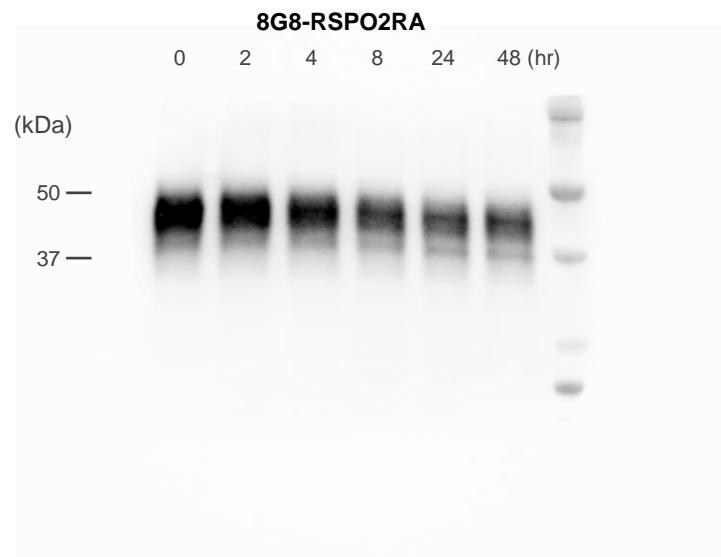

Supplement: fig6-figsupp1-data2 [file elife-93908-fig6-figsupp1-data2-v1.zip]

### 8M24-RSPO2RA

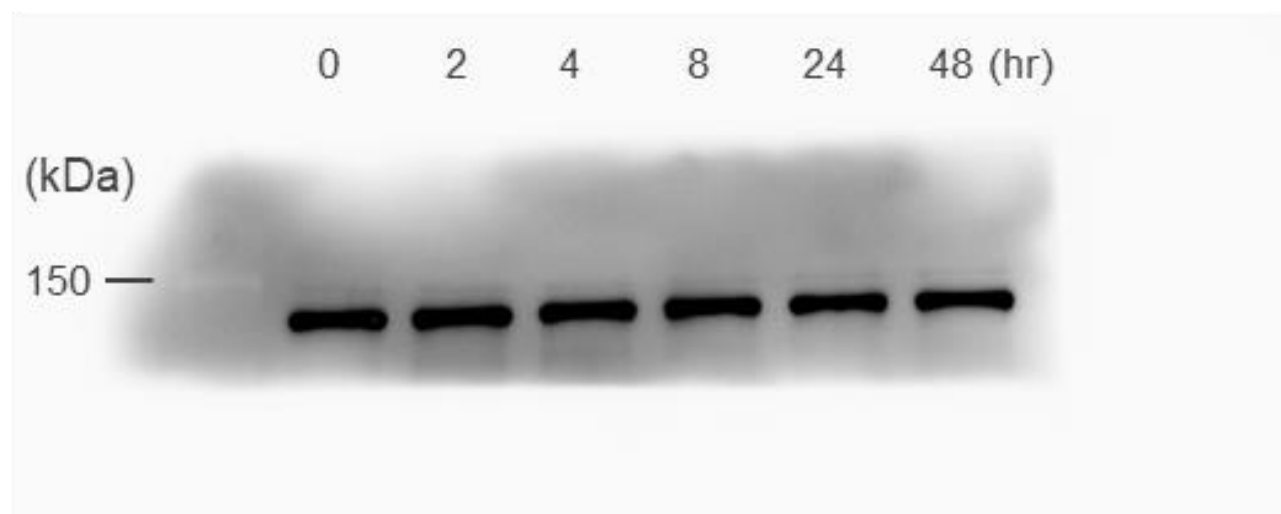

Supplement: fig6-figsupp1-data2 [file elife-93908-fig6-figsupp1-data2-v1.zip]

# 8M24-RSPO2RA

0 2 4 8 24 48 (hr)

(kDa)

50 —

37 —

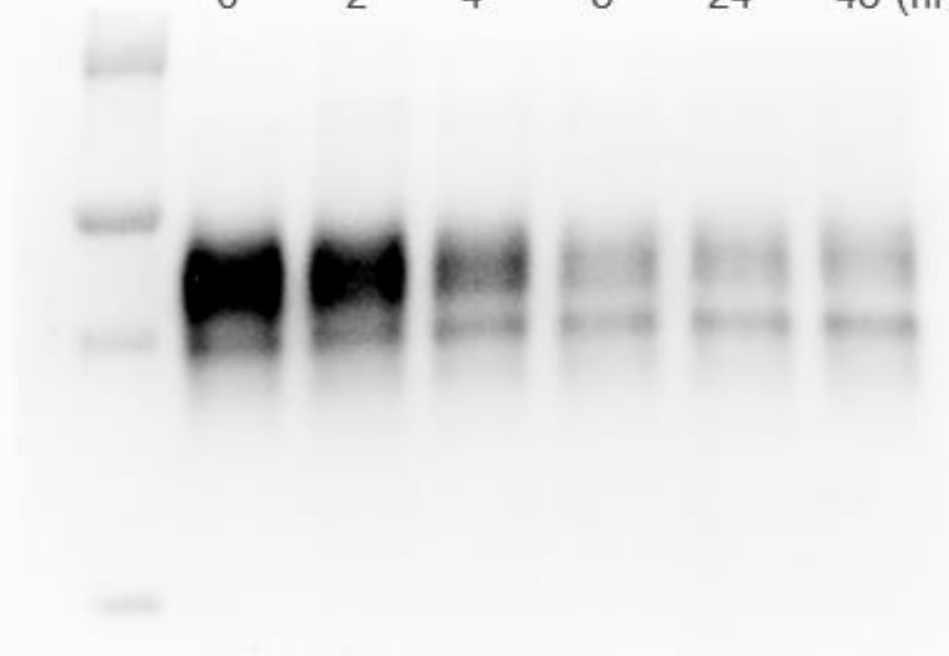

Supplement: fig6-figsupp1-data2 [file elife-93908-fig6-figsupp1-data2-v1.zip]

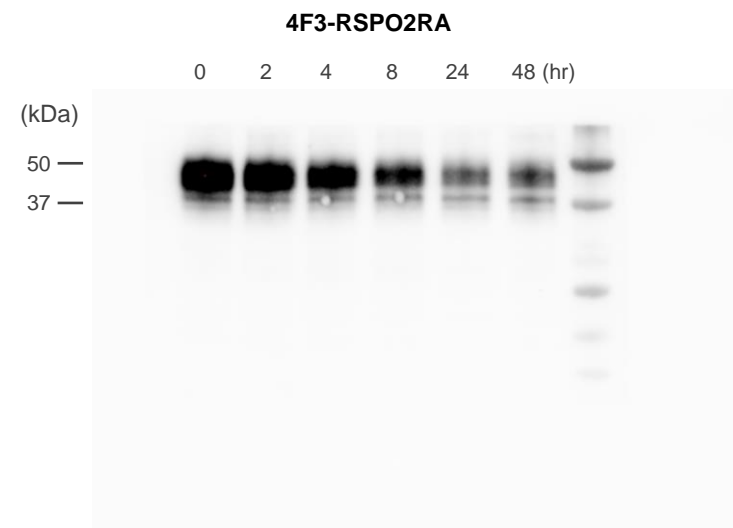

Supplement: fig6-figsupp1-data2 [file elife-93908-fig6-figsupp1-data2-v1.zip]

# 4F3-RSPO2RA

0 2 4 8 24 48 (hr)

(kDa)

150 —

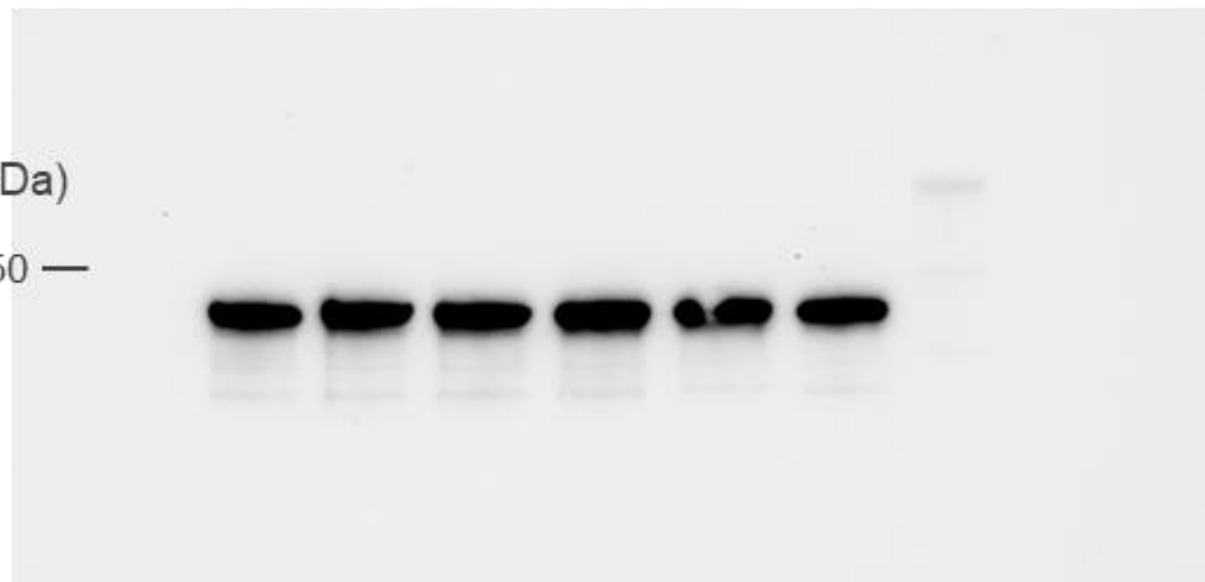

Supplement: fig6-figsupp1-data2 [file elife-93908-fig6-figsupp1-data2-v1.zip]

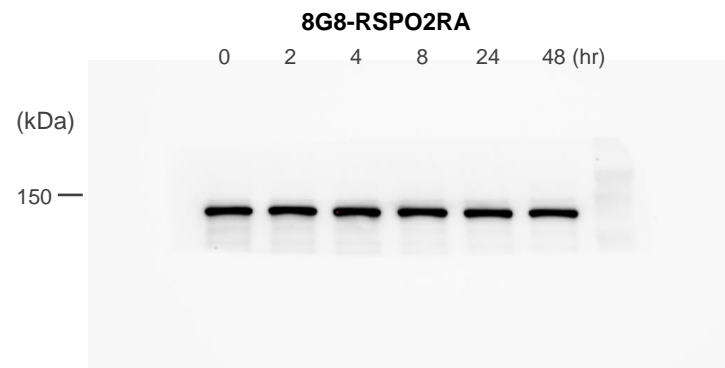

Supplement: fig6-figsupp1-data2 [file elife-93908-fig6-figsupp1-data2-v1.zip]

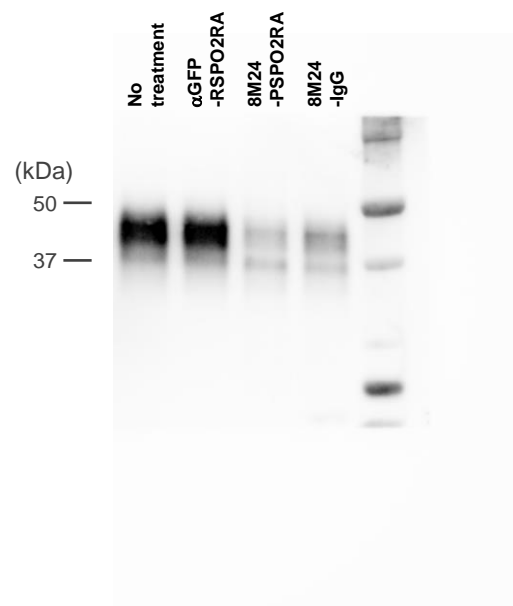

Supplement: fig6-figsupp1-data3 [file elife-93908-fig6-figsupp1-data3-v1.zip]

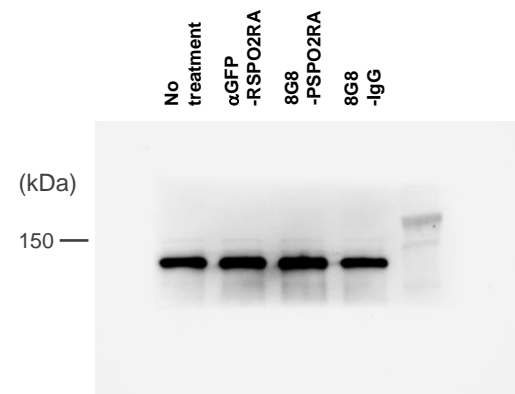

Supplement: fig6-figsupp1-data3 [file elife-93908-fig6-figsupp1-data3-v1.zip]

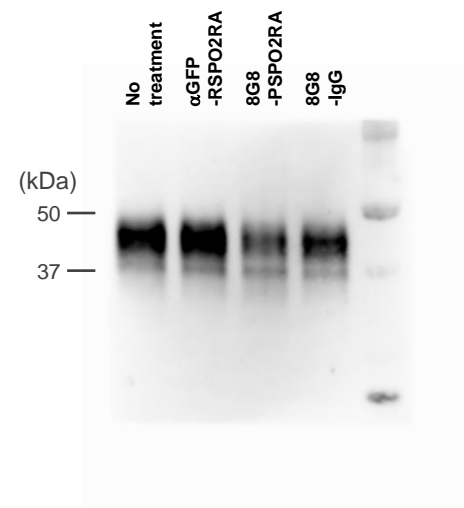

Supplement: fig6-figsupp1-data3 [file elife-93908-fig6-figsupp1-data3-v1.zip]

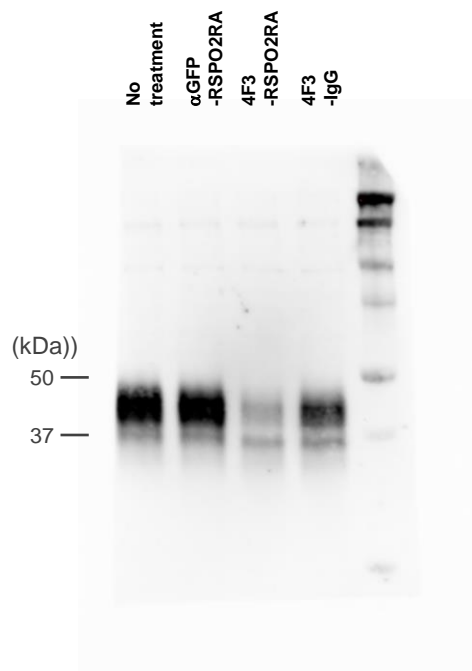

Supplement: fig6-figsupp1-data3 [file elife-93908-fig6-figsupp1-data3-v1.zip]

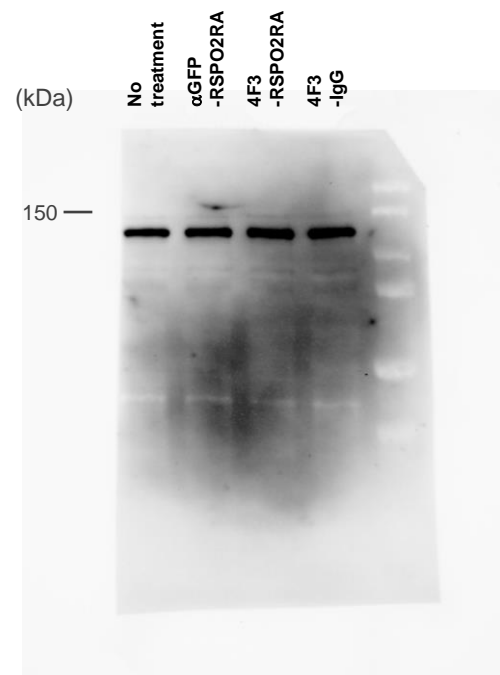

Supplement: fig6-figsupp1-data3 [file elife-93908-fig6-figsupp1-data3-v1.zip]

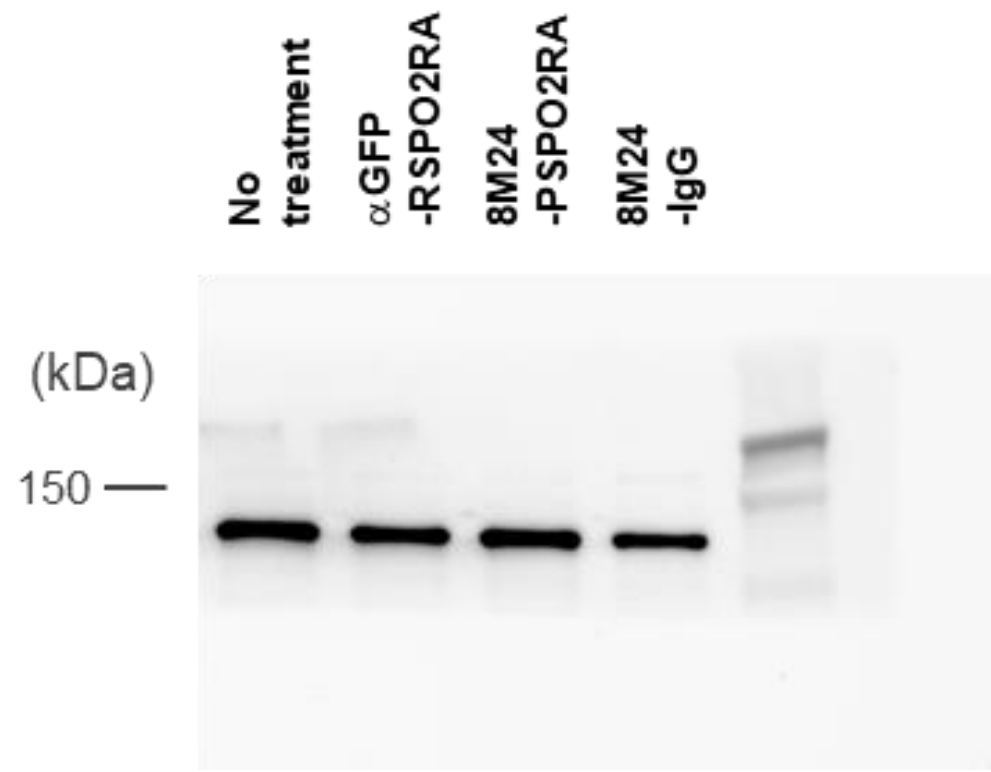

Supplement: fig6-figsupp1-data3 [file elife-93908-fig6-figsupp1-data3-v1.zip]

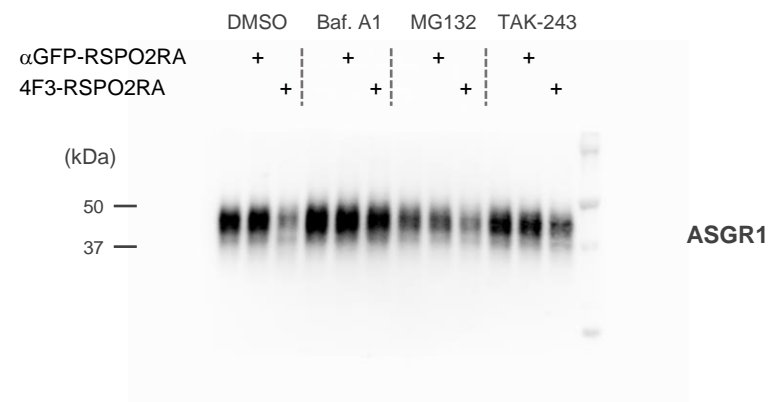

Supplement: fig6-figsupp1-data4 [file elife-93908-fig6-figsupp1-data4-v1.zip]

|                      | DMSO | Baf. A1 | MG132 | TAK-243 |
|----------------------|------|---------|-------|---------|
| $\alpha$ GFP-RSP02RA | +    | +       | +     | +       |
| 8G8-RSP02RA          | +    | +       | +     | +       |

(kDa)  
150 —

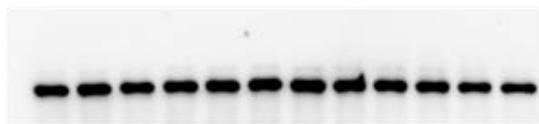

**Vinculin**

Supplement: fig6-figsupp1-data4 [file elife-93908-fig6-figsupp1-data4-v1.zip]

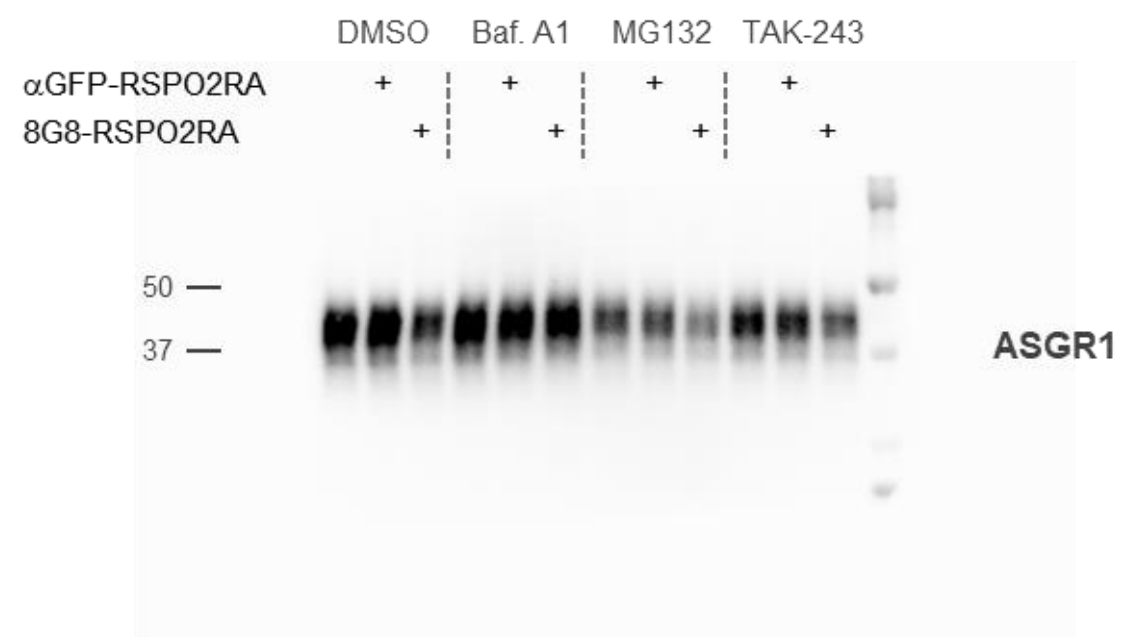

Supplement: fig6-figsupp1-data4 [file elife-93908-fig6-figsupp1-data4-v1.zip]

|                      | DMSO | Baf. A1 | MG132 | TAK-243 |
|----------------------|------|---------|-------|---------|
| $\alpha$ GFP-RSPO2RA | +    | +       | +     | +       |
| 8M24-RSPO2RA         | +    | +       | +     | +       |

(kDa)

20 —  
15 —  
10 —

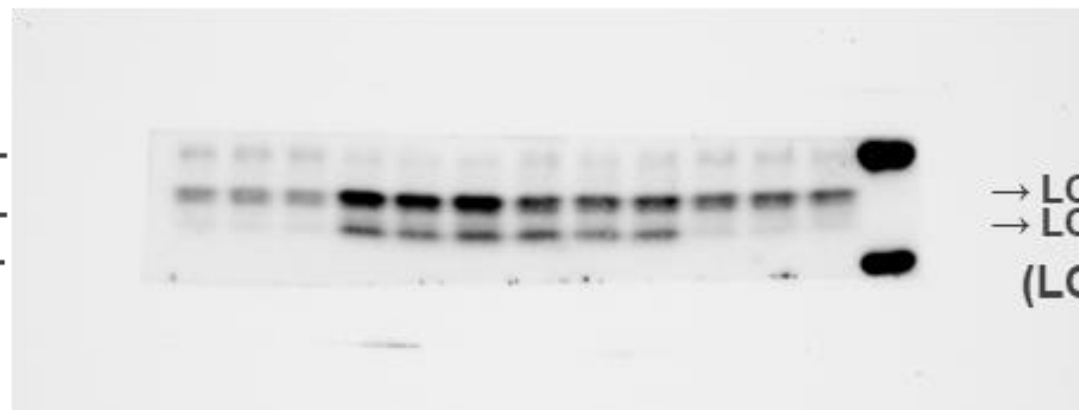

→ LC3B-I  
→ LC3B-II  
(LC3B)

Supplement: fig6-figsupp1-data4 [file elife-93908-fig6-figsupp1-data4-v1.zip]

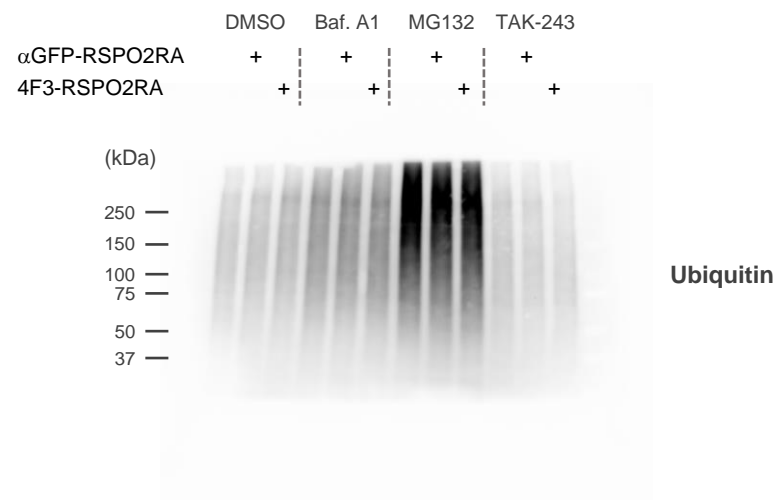

Supplement: fig6-figsupp1-data4 [file elife-93908-fig6-figsupp1-data4-v1.zip]

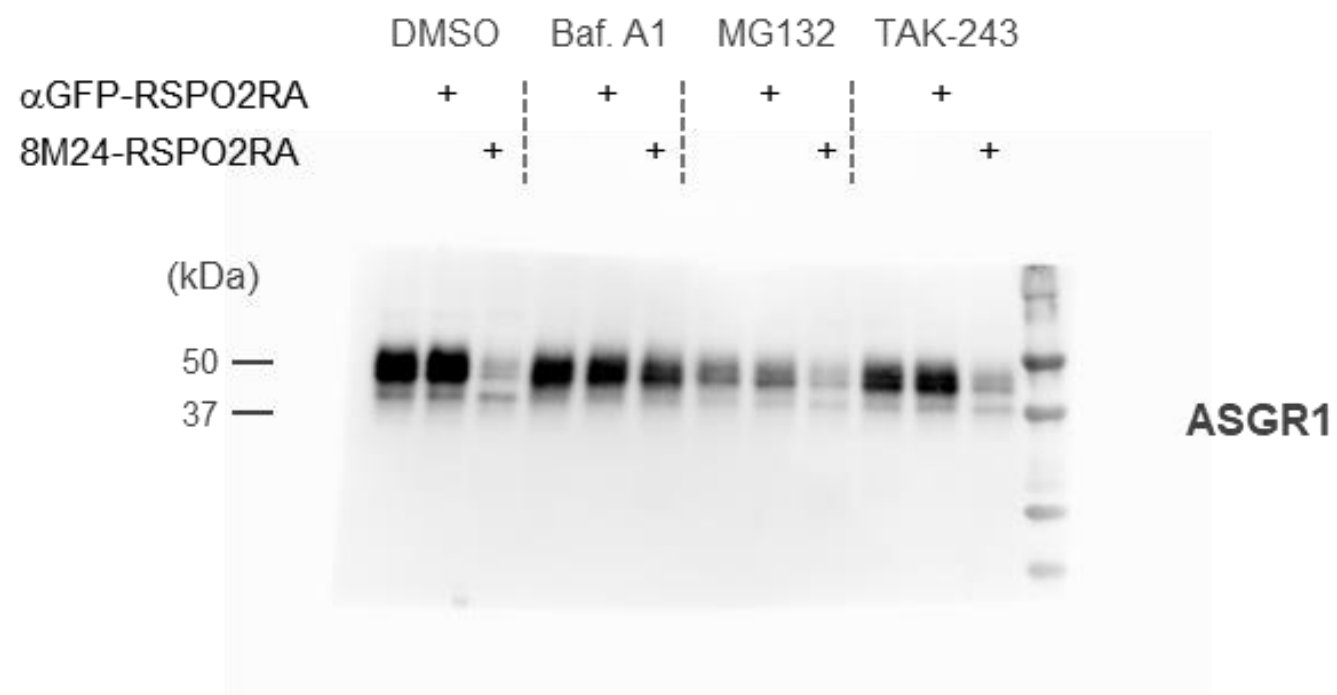

Supplement: fig6-figsupp1-data4 [file elife-93908-fig6-figsupp1-data4-v1.zip]

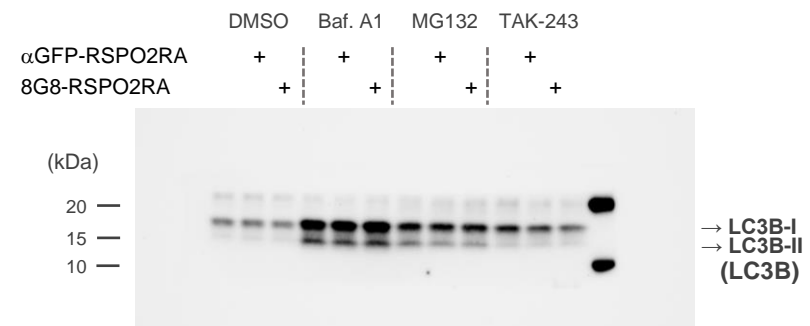

Supplement: fig6-figsupp1-data4 [file elife-93908-fig6-figsupp1-data4-v1.zip]

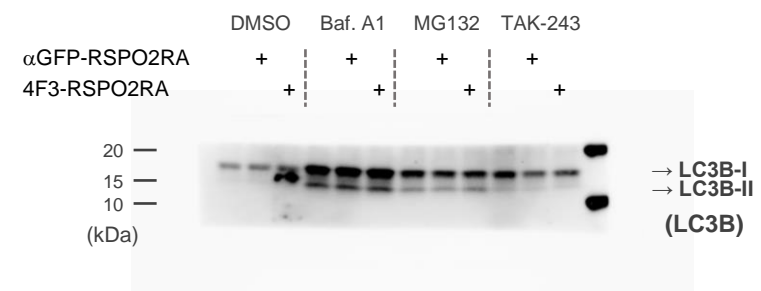

Supplement: fig6-figsupp1-data4 [file elife-93908-fig6-figsupp1-data4-v1.zip]

|                      | DMSO | Baf. A1 | MG132 | TAK-243 |
|----------------------|------|---------|-------|---------|
| $\alpha$ GFP-RSPO2RA | +    | +       | +     | +       |
| 4F3-RSPO2RA          | +    | +       | +     | +       |

(kDa)  
150 —

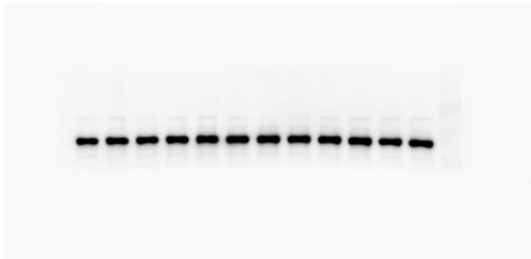

Vinculin

Supplement: fig6-figsupp1-data4 [file elife-93908-fig6-figsupp1-data4-v1.zip]

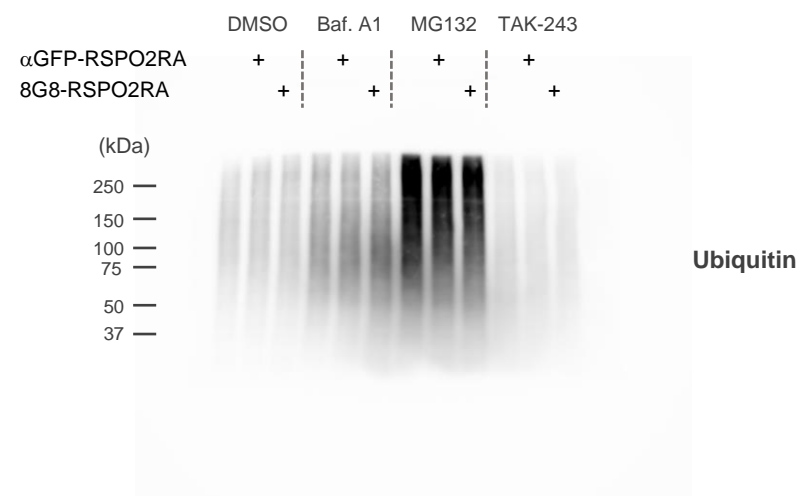

Supplement: fig6-figsupp1-data4 [file elife-93908-fig6-figsupp1-data4-v1.zip]

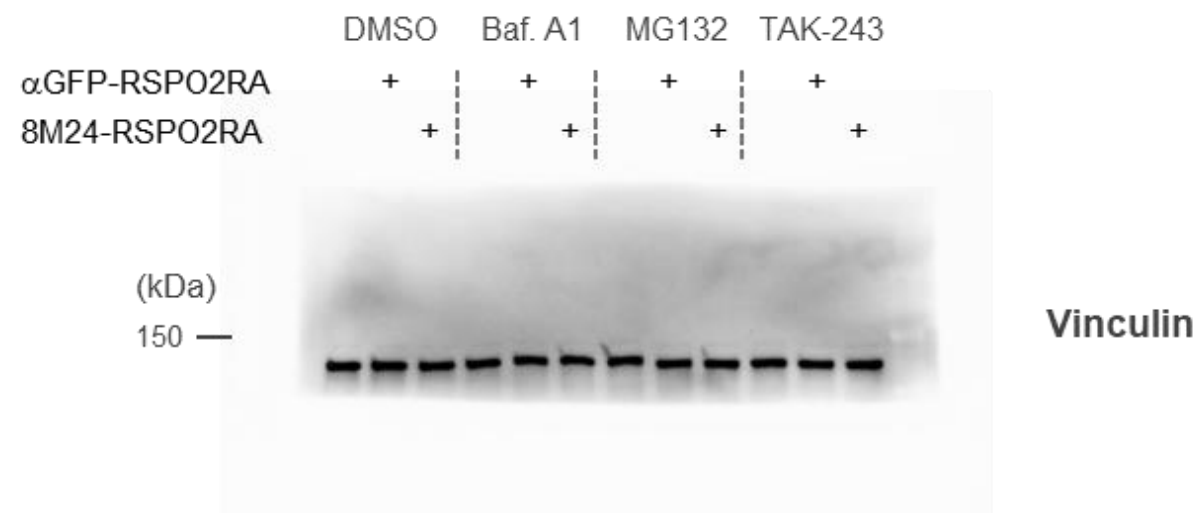

Supplement: fig6-figsupp1-data4 [file elife-93908-fig6-figsupp1-data4-v1.zip]

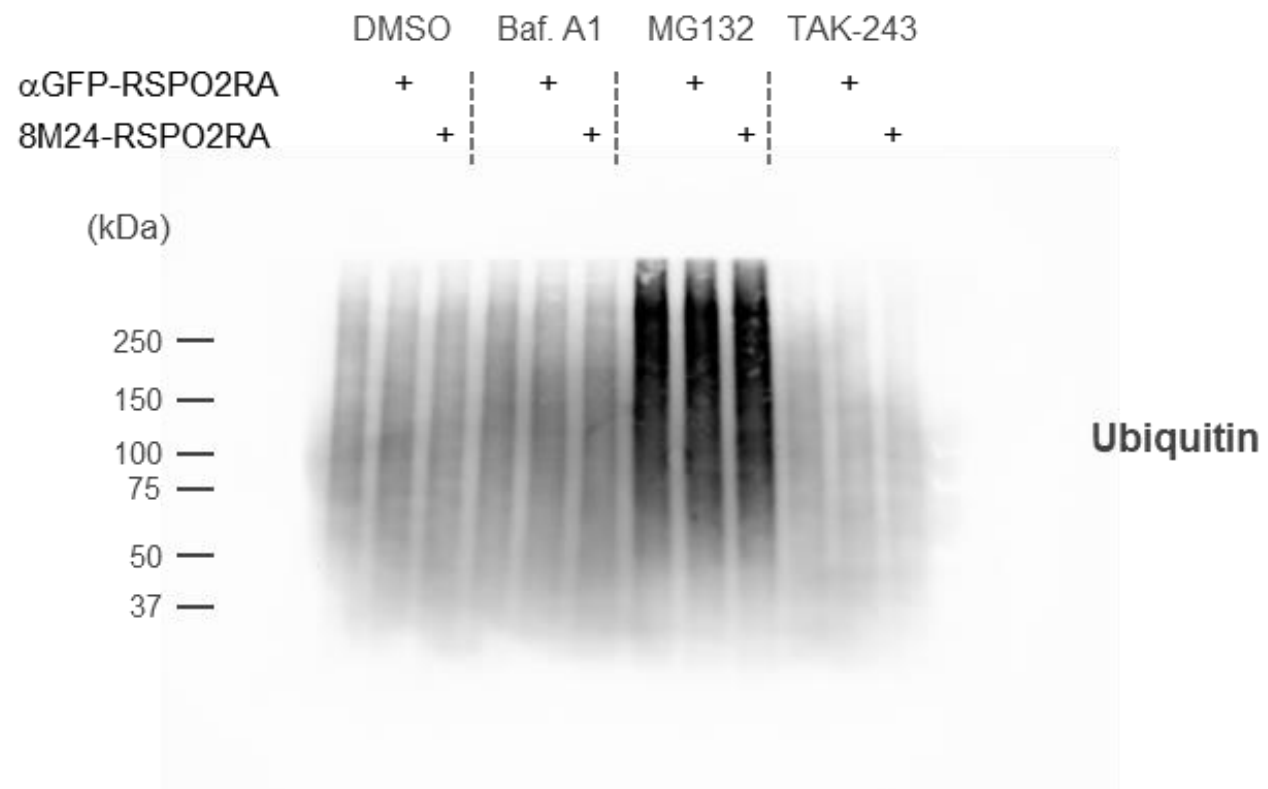

Supplement: fig6-figsupp1-data4 [file elife-93908-fig6-figsupp1-data4-v1.zip]

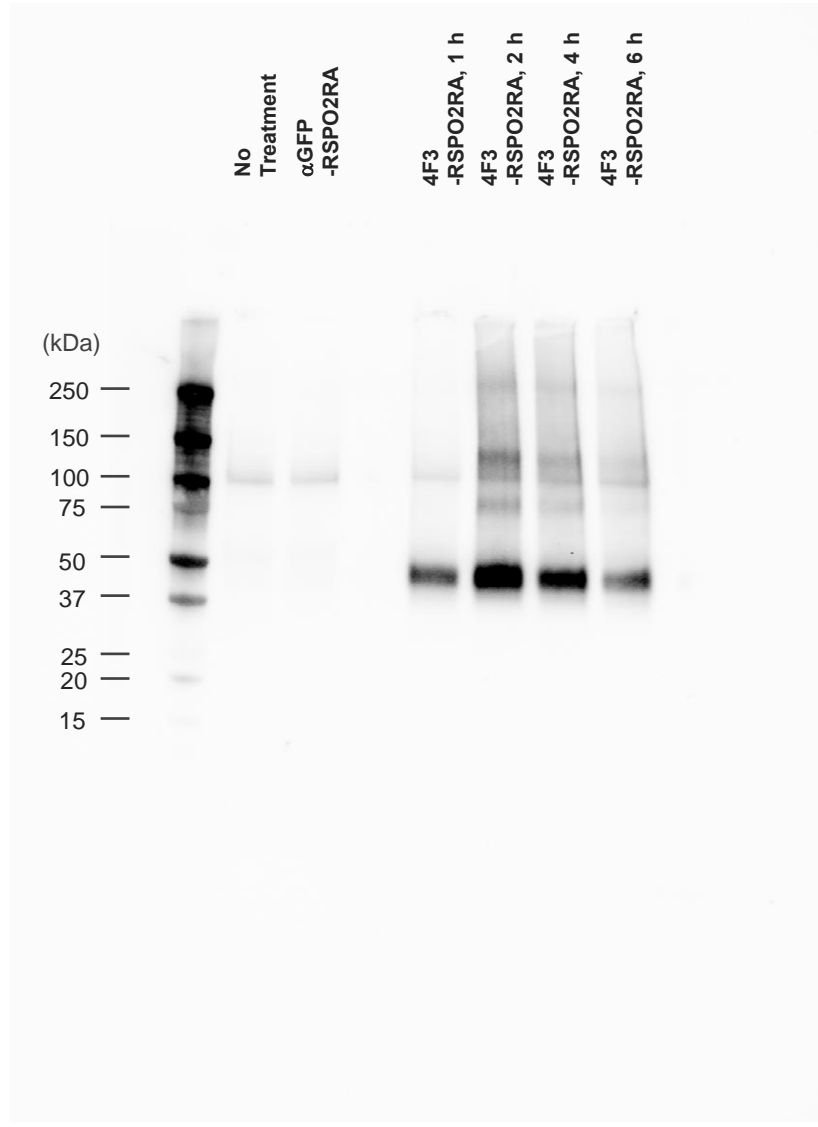

Supplement: fig7-data1 [file elife-93908-fig7-data1-v1.zip]

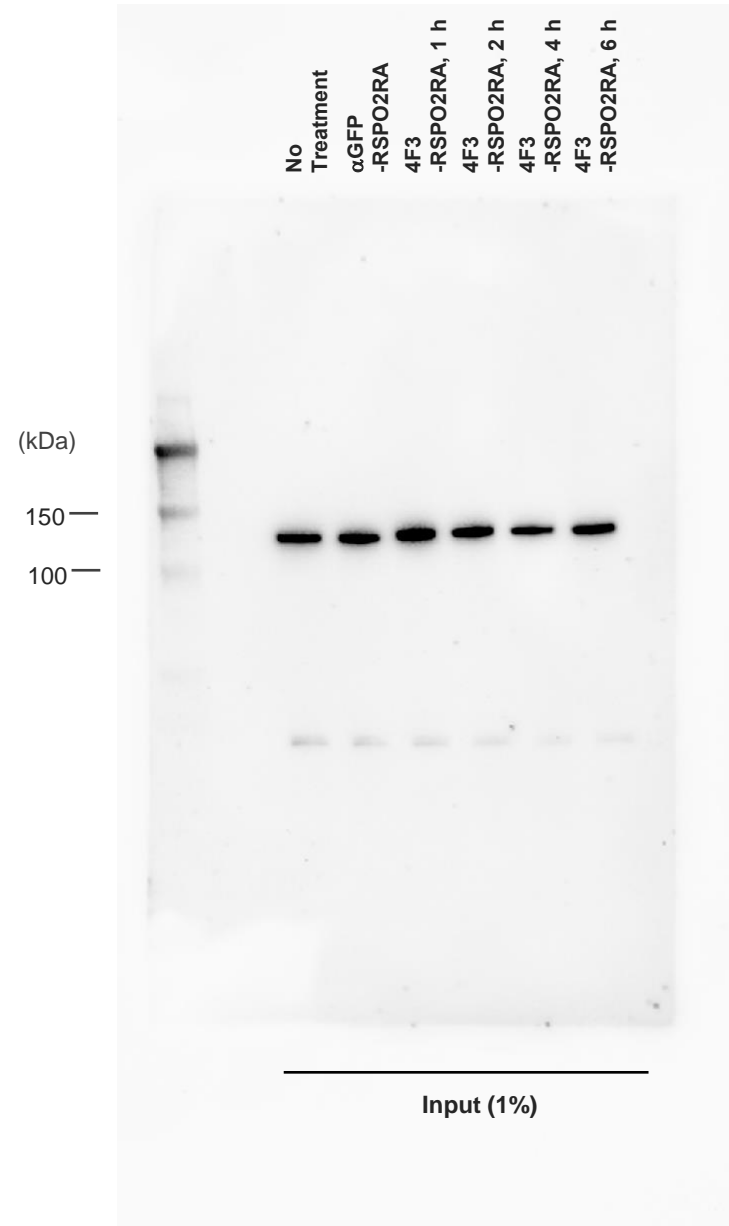

Supplement: fig7-data1 [file elife-93908-fig7-data1-v1.zip]

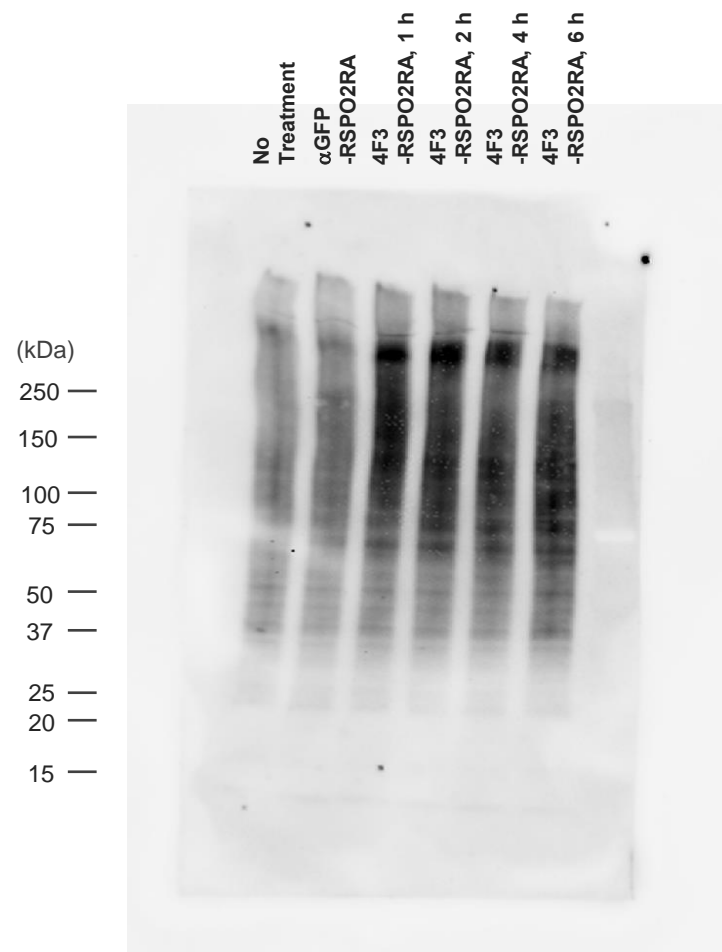

Supplement: fig7-data1 [file elife-93908-fig7-data1-v1.zip]

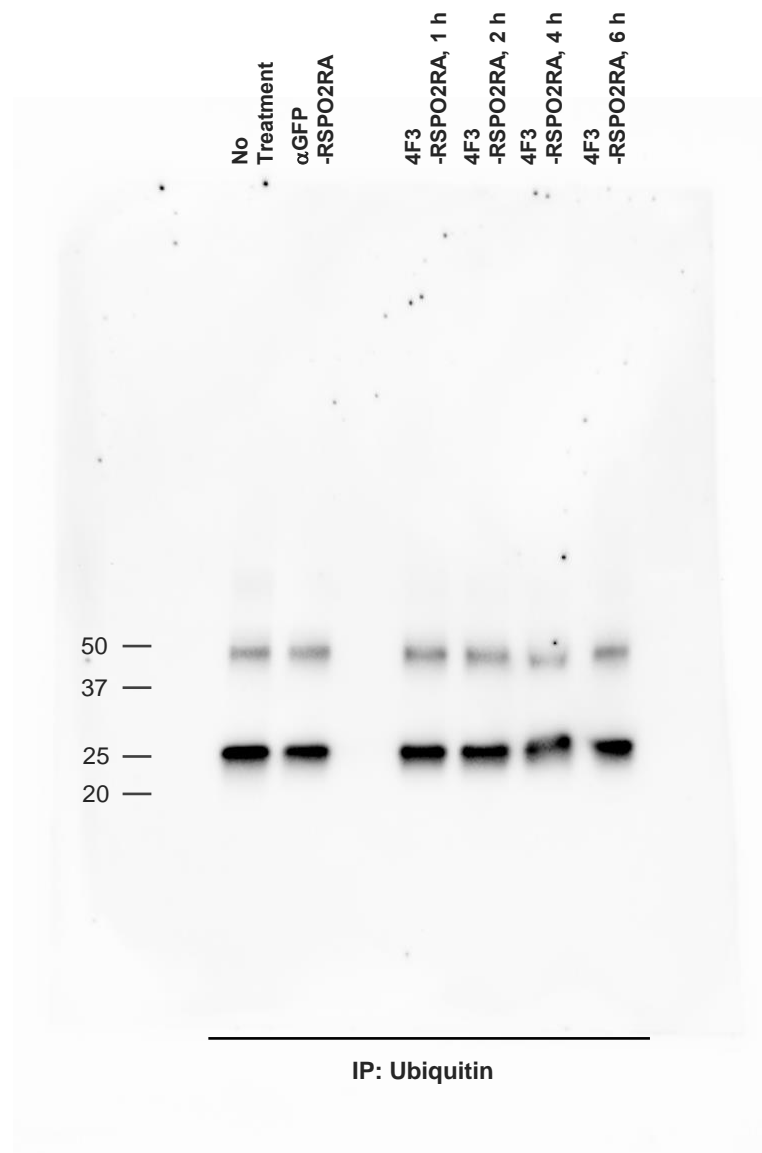

Supplement: fig7-data1 [file elife-93908-fig7-data1-v1.zip]

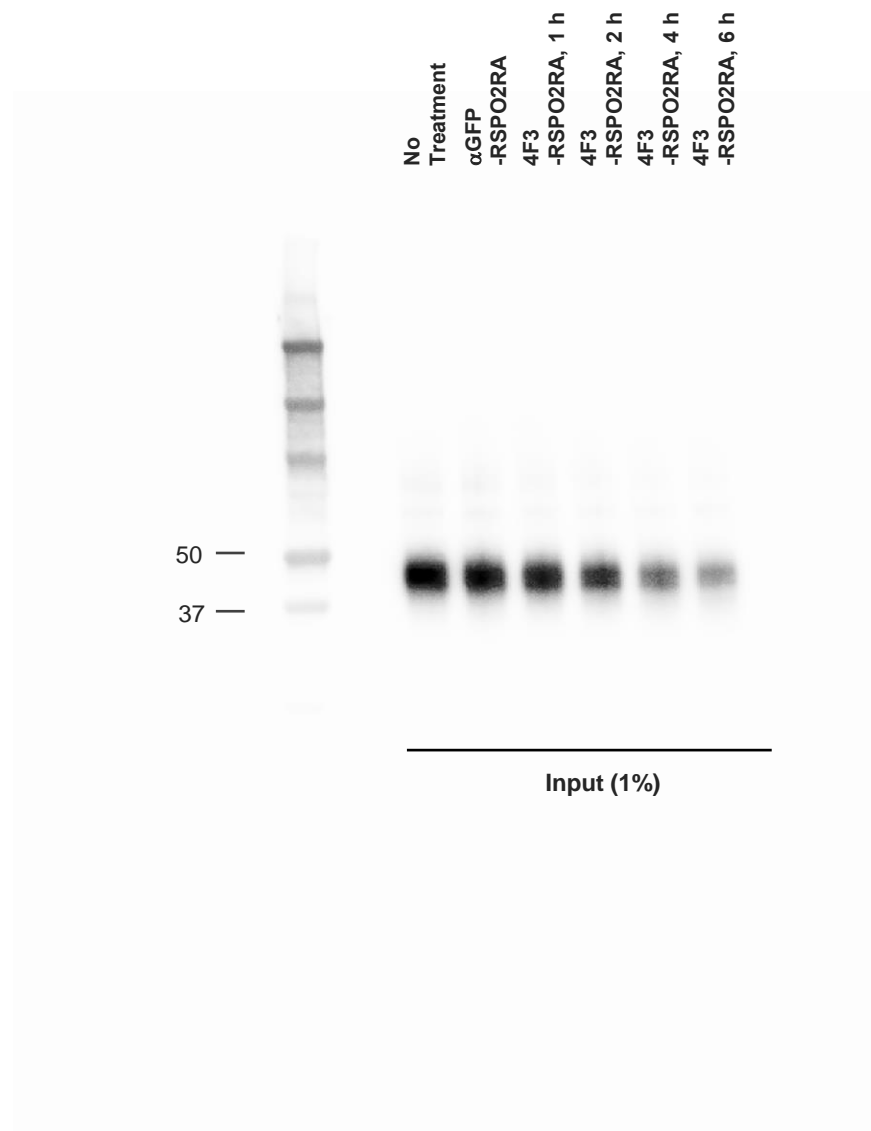

Supplement: fig7-data1 [file elife-93908-fig7-data1-v1.zip]

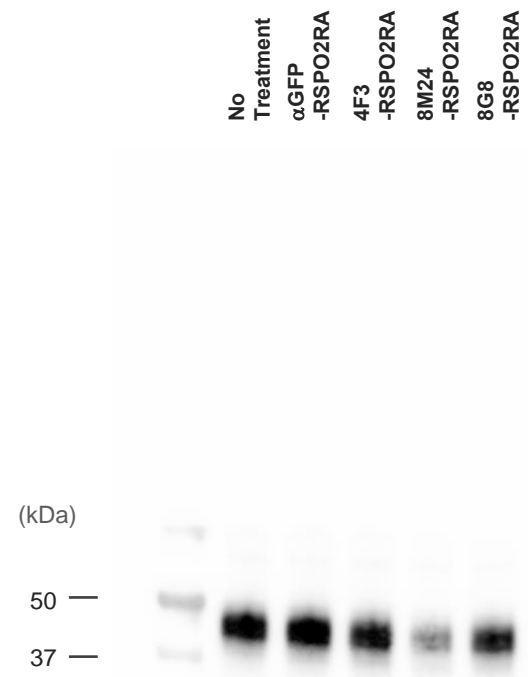

Supplement: fig7-data2 [file elife-93908-fig7-data2-v1.zip]

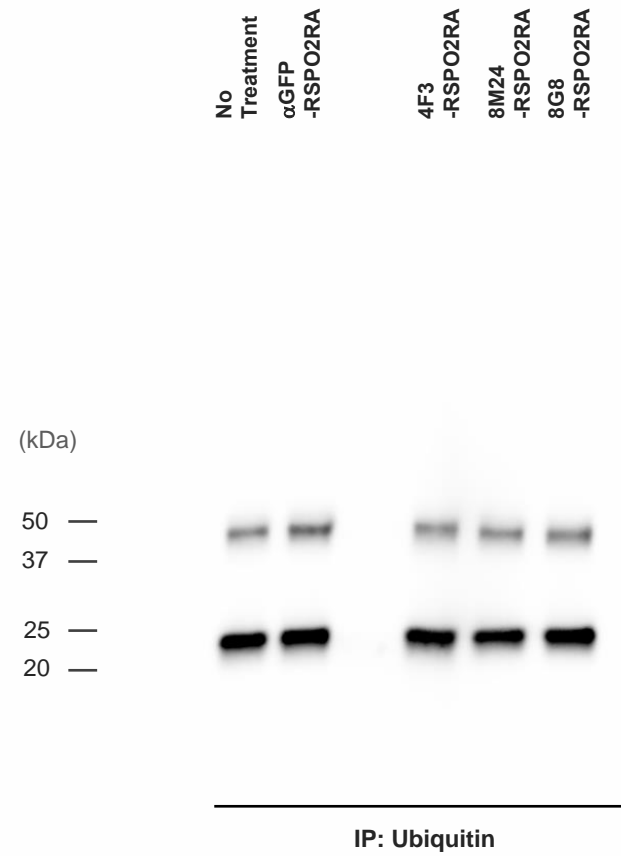

Supplement: fig7-data2 [file elife-93908-fig7-data2-v1.zip]

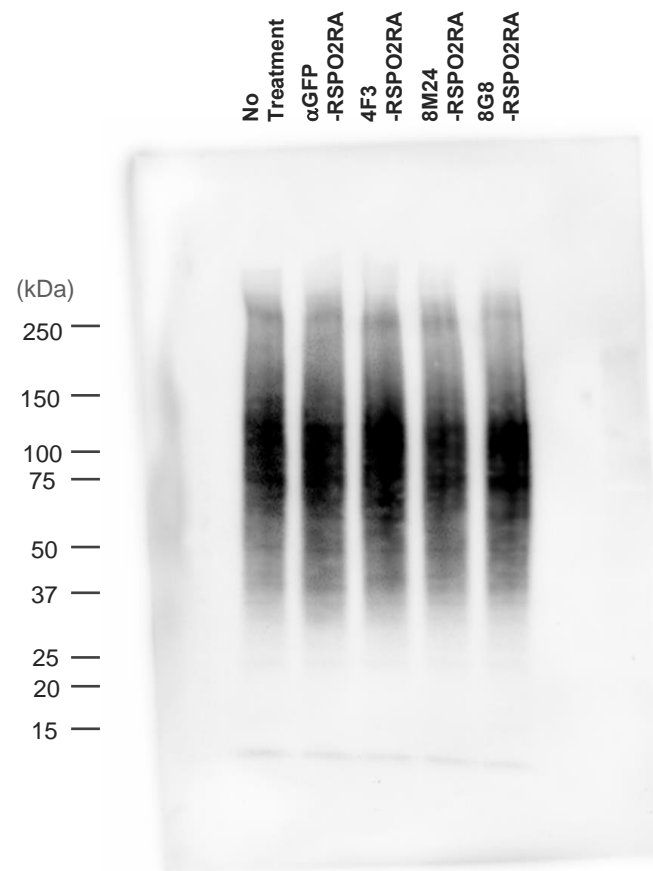

Supplement: fig7-data2 [file elife-93908-fig7-data2-v1.zip]

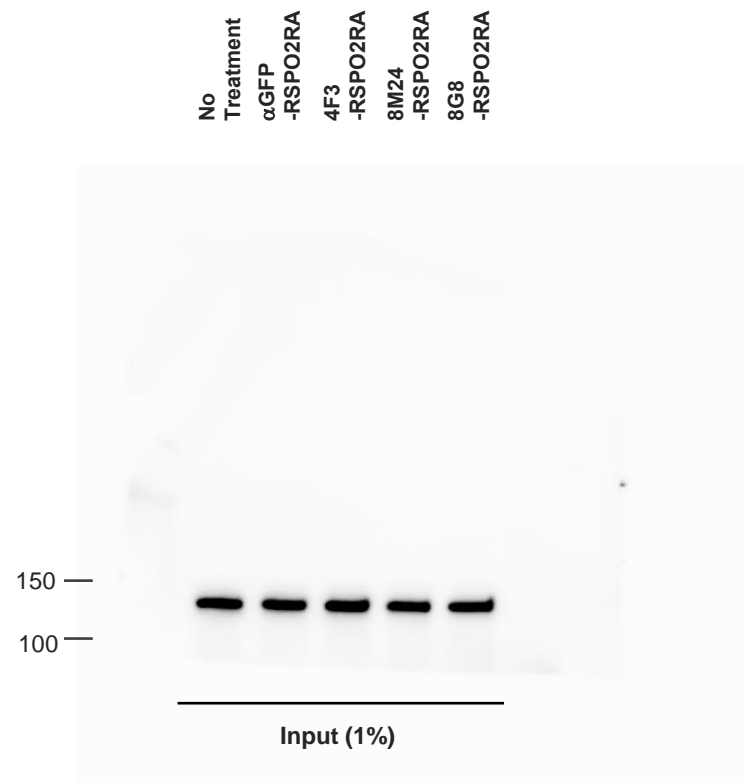

Supplement: fig7-data2 [file elife-93908-fig7-data2-v1.zip]

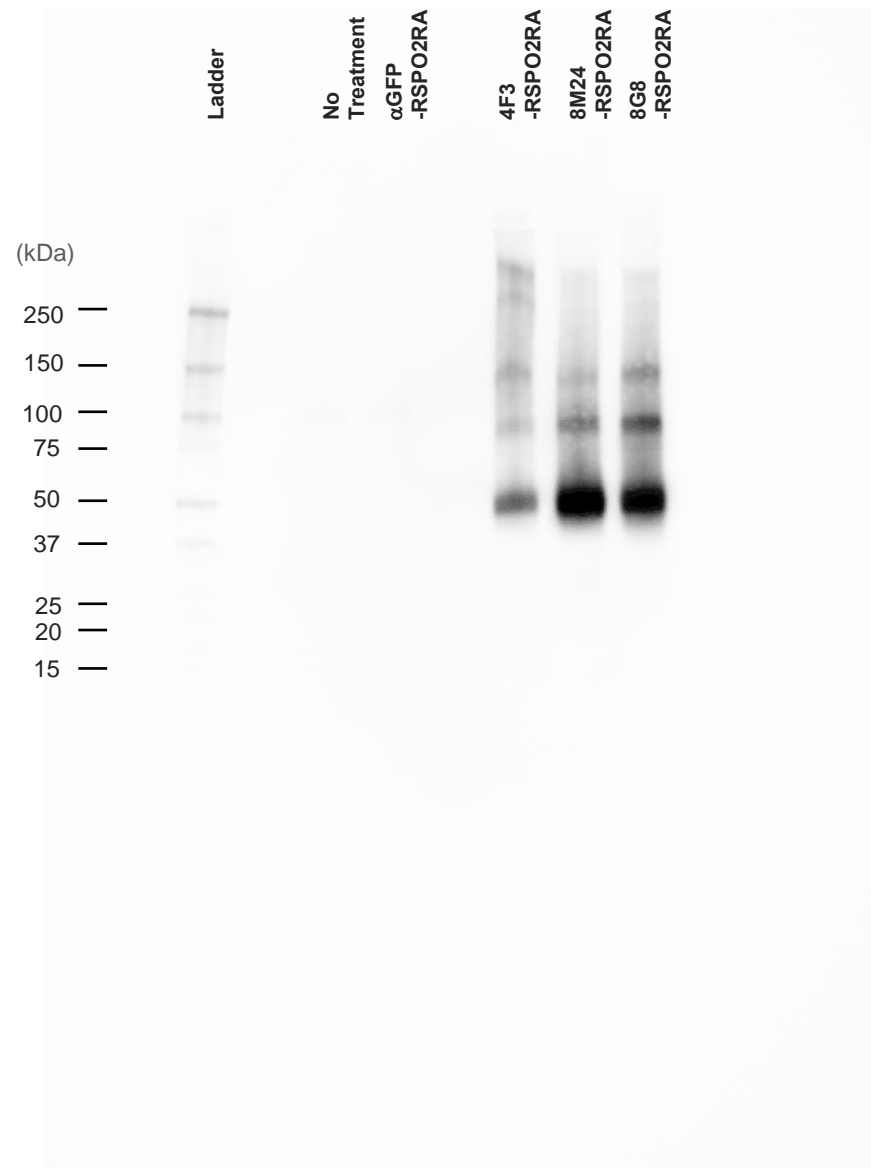

Supplement: fig7-data2 [file elife-93908-fig7-data2-v1.zip]

WT ASGR1

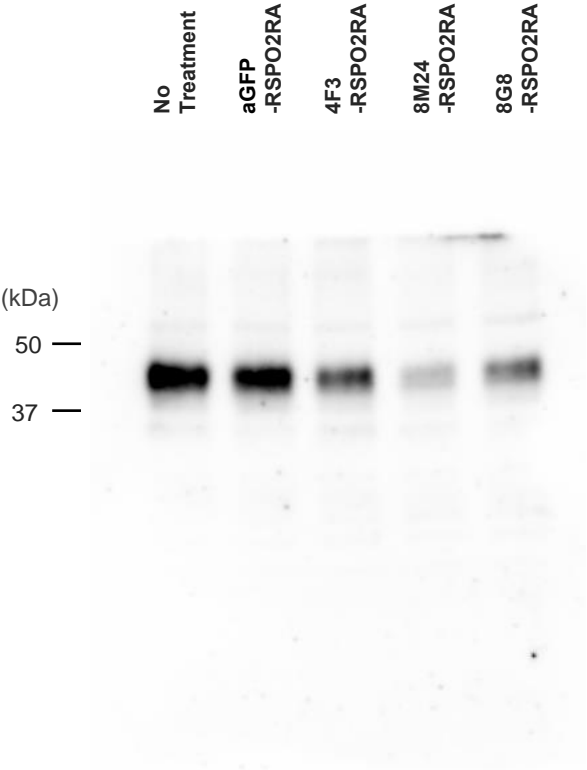

Supplement: fig7-data3 [file Figure 7C anti-ASGR1 with WT ASGR1 transfection_Labelled Raw Data.pdf › Figure 7C anti-ASGR1 with WT ASGR1 transfection_Labelled Raw Data.pdf]

mut ASGR1

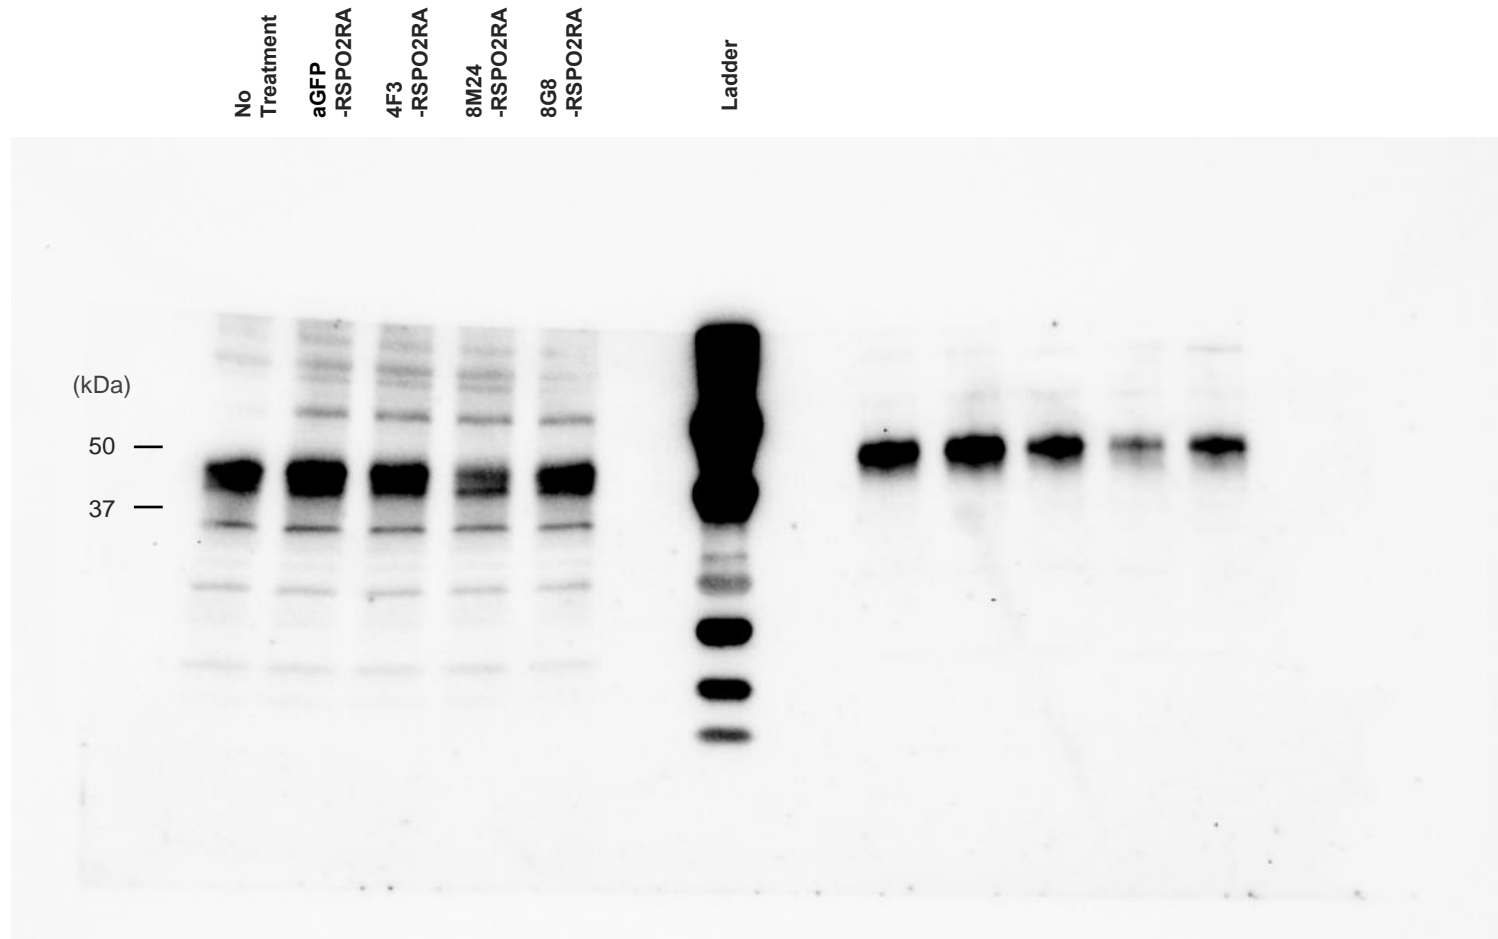

Supplement: fig7-data3 [file Figure 7C anti-ASGR1 with mut ASGR1 transfection_Labelled Raw Data.pdf › Figure 7C anti-ASGR1 with mut ASGR1 transfection_Labelled Raw Data.pdf]

# WT ASGR1

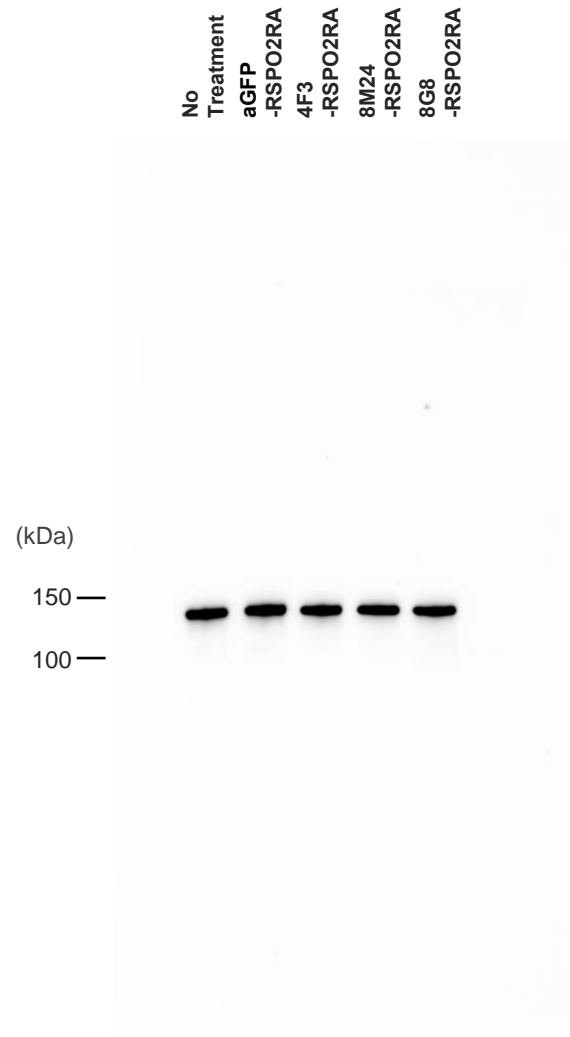

Supplement: fig7-data3 [file Figure 7C anti-Vinculin with WT ASGR1 transfection_Labelled Raw Data.pdf › Figure 7C anti-Vinculin with WT ASGR1 transfection_Labelled Raw Data.pdf]

mut ASGR1

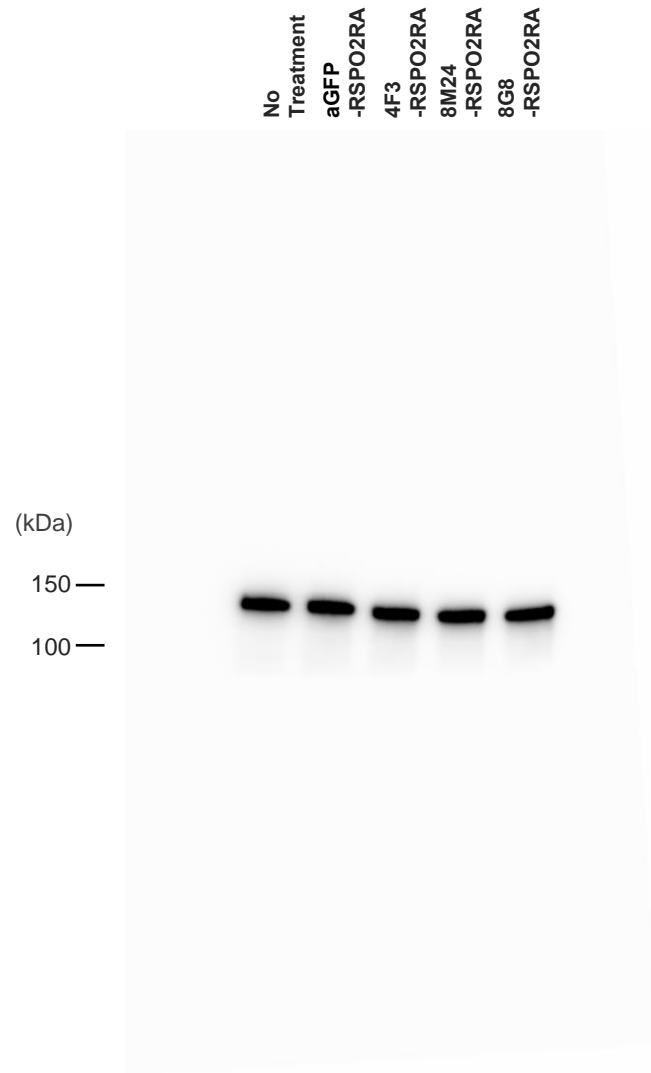

Supplement: fig7-data3 [file Figure 7C anti-Vinculin with mut ASGR1 transfection_Labelled Raw Data.pdf › Figure 7C anti-Vinculin with mut ASGR1 transfection_Labelled Raw Data.pdf]
